# Supplementary material
Source: PubMed Central journal article supplement (PMC2733777)

**Supplemental Figure S1:  $\beta_1$  – integrins are major coreceptors of galectin-8 in the TM.** Proteins extracted from cultured TM cells were incubated with Gal8-affinity matrix. Gal8 bound proteins were eluted with  $\beta$ -lactose, electrophoresed on a polyacrylamide gel in the presence of SDS and identified by LC/MS/MS. A minimum of four unique, non-overlapping peptides was set as a threshold for a match. Sequences of proteins identified in the 125-kDa band (Figure 4A) are presented with matched peptides highlighted. A: integrin  $\beta_1$ ; B: integrin  $\alpha_3$ ; C, integrin:  $\alpha_5$ ; D: integrin  $\alpha_v$ . This experiment was performed twice, with reproducible results.

Figure S1

|          |      |             |             |             |             |            |            |             |             |            |
|----------|------|-------------|-------------|-------------|-------------|------------|------------|-------------|-------------|------------|
| <b>A</b> | 1    | GEAQRESRNS  | RPEPTAPGPG  | RRAEKMNLPQ  | IFWIGLISSV  | CCVFAQTDEN | RCLKANAKSC | GECIQAGPNC  | GWCTNSTFLQ  |            |
|          | 81   | EGMPTSARCD  | DLEALKKKGK  | PPDDIENPRG  | SKDIKKNKNV  | TNRSKGTAEK | LKPEDITQIQ | POQLVLR     | LRS         | GEPQTFTLKF |
|          | 161  | KRAEDYPIDL  | YYLMDLSYSM  | KDDLLENVKS  | GTDLMNEMRR  | ITSDFRIGFG | SFVEKTVMPY | ISTTPAKLRN  | PCTSEQNCTS  |            |
|          | 241  | PFSYKNNVLSL | TNKGEVFNEL  | VGKQRISGNL  | DSPEGGFDAI  | MQVAVCGSLI | GWRNVTRLLV | FSTDAGFHFA  | GDGKLGIVL   |            |
|          | 321  | PNDGQCHLEN  | NMYTMSHYD   | YPSIAHLVQK  | LSENNIQTIF  | AVTEEFQPVY | KELKNLIPKS | AVGTLANS    | NVIQLIIDAY  |            |
|          | 401  | NSLSSEVILE  | NGKLESEVTI  | SYKSYCKNGV  | NGTGENGRKC  | SNISIGDEVQ | FEISITSNKC | PKKSDSFKI   | RPLGFTEEVE  |            |
|          | 481  | VILQYICECE  | CQSEGIPEP   | KCHEGNGTFE  | CGACRCNEGR  | VGRHCECSTD | EVNSEMDAY  | CRKENSSEIC  | SNNGECVCGQ  |            |
|          | 561  | CVCRKRDNNTN | EIYSGKFCEC  | DNFNCDRSNG  | LICGGNGVCK  | CRVCECNPNY | TGSACDCSLD | TSTCEASNGQ  | ICNGRGICEC  |            |
|          | 641  | GVCKCTDPKF  | QGQTCEMCQT  | CLGVCAEHKE  | CVQCRAFNGK  | EKKDTCQTEC | SYFNITKVES | RDKLPQVPQ   | DPVSHCKEKD  |            |
|          | 721  | VDDCWYFPTY  | SVNGNNEVMV  | HVVENPECP   | GPDIIPVAVG  | VVAGIVLIGL | ALLLIWKLML | IHDRREFAK   | FEKEKMNAKW  |            |
|          | 801  | DTGENPIYKS  | AVTTVVNPKY  | EGK         |             |            |            |             |             |            |
| <b>B</b> | 1    | MGPGPSRAPR  | APRLMLCALA  | LMVAAGGCVV  | SAFNLDTRFL  | VVKEAGNPGS | LFGYSVALHR | QTERQQRVLL  | LAGAPRELAV  |            |
|          | 81   | PDGYTNRGTGA | VYLCLPTAHK  | DDCERMNITV  | KNDPGHHIE   | DMWLGVTVAS | QGPAGRVLVC | AHRYTQVLWS  | GSEDQRRMVG  |            |
|          | 161  | KCYVRGNDLE  | LDSSDDWQTY  | HNEMCNSNTD  | YLETGMCQLG  | TSGGFTQNTV | YFGAPGAYNW | KGNSYMIQRK  | EWDLSEYSYK  |            |
|          | 241  | DPEDQGNLYI  | GYTMQVGSFI  | LHPKNITIVT  | GAPRHRHMG   | VFLLSQEAGG | DLRRRQVLEG | SQVGAYFGSA  | IADLADLNDG  |            |
|          | 321  | WQDLLVVGAPY | YFERKEEVGG  | AIYVFMNQAG  | TSFPAHPSLL  | LHGPGSAGF  | LSVASIGDIN | QDGFQDIAVG  | APFEGLGKVVY |            |
|          | 401  | IYHSSSKGLL  | RQPQQVIHGE  | KLGLPGLATF  | GYSLSGQMDV  | DENFYDPLLV | GSLSDHIVLL | RARPVINIVH  | KTLVPRPAVL  |            |
|          | 481  | DPALCTATSC  | VQVELCFAYN  | QSAGNPYR    | NITLAYTLEA  | DRDRRPPRLR | FAGSESAVFH | GFFSMPMERC  | QKLELLMDN   |            |
|          | 561  | LRDKLRPIII  | SMNYSPLPRM  | PDRPRLGLRS  | LDAYPILNQA  | QALENHTEVQ | FQKECGPDNK | CESNLQMRAA  | FVSEQQKLS   |            |
|          | 641  | RLQYSRDVRK  | LLL SINVTNT | RTSERSGEDA  | HEALLTLVVP  | PALLLSSVRP | PGACQANETI | FCELGNPFKR  | NQRMELLIAF  |            |
|          | 721  | EVIGVTLHTR  | DLQVQLQLST  | SSHQDNLWPM  | ILTLVLDVYTL | QTSLSMVNRH | LQSFFGGTVM | GESGMKTVED  | VGSPKLYEFQ  |            |
|          | 801  | VGPMGEGLVG  | LGLTLVLGLEW | PYEVSNGKWL  | LYPTEITVHG  | NGSWPCRPPG | DLINPLNLTL | SDPGRDPSSP  | QRRRQLDPG   |            |
|          | 881  | GGQGPVPVTL  | AAAKKAKSET  | VLTCATGRAH  | CVWLECIPI   | APVVTNVTVK | ARVWNSTFIE | DYRDFDRVRV  | NGWATLFLRT  |            |
|          | 961  | SIPTINMENK  | TTWFSVDIDS  | ELVEELPAEI  | ELWLVLVAVG  | AGLLLLGLII | LLLWKCGFFK | RTRYQIMPK   | YHAVRIRREE  |            |
|          | 1041 | RYPPPGSTLP  | TKKHVWTSWQ  | TRDQYY      |             |            |            |             |             |            |
| <b>C</b> | 1    | MAFPFRRRLR  | LGRPLPLLL   | SGLLLPLCRA  | FNLDVDSPA   | YSGPEGSYFG | FAVDFFVPSA | SSRMFLLVGA  | PKANTTQPGI  |            |
|          | 81   | VEGGQVLKCD  | WSSTRRCQPI  | EFDATGNRDY  | AKDDPLEFKS  | HQWFGASVRS | KQDKILACAP | LYHWRTMCKQ  | EREPVGTCLF  |            |
|          | 161  | QDGTKTVEYA  | PCRSQDIDAD  | GQGFQGGFS   | IDFTKADRVL  | LGGPGSFYQ  | GQLISDQVAE | IVSKYDPNVY  | SIKYNNQLAT  |            |
|          | 241  | RTAQAIFFD   | YLGYSVAVGD  | FNGDGIDDFV  | SGVPRAARTL  | GMVYIYDGKN | MSSLYNFTGE | QMAAYFGFSV  | AATDINGDDY  |            |
|          | 321  | ADVFIGAPLF  | MDRGSQKGLQ  | EVGQVSVSLQ  | RASGDFQTTK  | LNGFEVFARF | GSAIAPLGD  | DQDGFNDIAI  | AAPYGGEDKK  |            |
|          | 401  | GIVYIFNGRS  | TGLNAVPSQI  | LEGQRAARSM  | PPSFGYSMKG  | ATDIDKNGYP | DLIVGAFGVD | RAILYRARPV  | ITVNAGLEVY  |            |
|          | 481  | PSILNQDNKT  | CSLPGTALKV  | SCFNVRFLCK  | ADGKGVLPK   | LNFQVELLLD | KLKQKGAIRR | ALFLYSRSPS  | HSKNMTISRG  |            |
|          | 561  | GLMQCEELIA  | YLRDESEFRD  | KLTPITIFME  | YRLDYRTAAD  | TTGLQPILNQ | FTPANISRQA | HILLDCGEDN  | VCKPKLEVS   |            |
|          | 641  | DSQDKKIYIG  | DDNPLTLIVK  | AQNQEGEGAYE | AELIVSIPLQ  | ADFIGVVRNN | EALARLSCAF | KTENQTRQVV  | CDLGNPMKAG  |            |
|          | 721  | TQLLAGLRF   | VHQQSEMDTS  | VKFDLQIQSS  | NLFDKVPV    | SHKVDLAVLA | AVEIRGVSSP | DHVFLPIPNW  | EHKENPETEE  |            |
|          | 801  | DVGPVVQHIY  | ELRNNGPSSF  | SKAMLHLQWP  | YKYNNTLLY   | ILHYDIDGPM | NCTSDMEINP | LRIKISSLQT  | TEKNDTVAGQ  |            |
|          | 881  | GERDHLITKR  | DLALSEGDIH  | TLGCGVAQCL  | KIVCQVGRLD  | RGKSAILYVK | SLLTWETFNM | KENQNHYSYL  | KSSASFNVIE  |            |
|          | 961  | FPYKNLPIED  | ITNSTLVTTN  | VTWGIQPAM   | PVPVWVILIA  | VLAGLLLLAV | LVFVMYRMGF | FKRVPPQEE   | QEREQLQPRE  |            |
|          | 1041 | NGEGNSET    |             |             |             |            |            |             |             |            |
| <b>D</b> | 1    | RWGPRRRPPL  | LPLLLLLLPP  | PPRVGGFNLD  | AEAPAVLSGP  | PGSFFGFSVE | FYRPGTDGVS | VLVGA PKANT | SQPGVLQGGA  |            |
|          | 81   | VYLCWPWASP  | TQCTPIEFDS  | KGSRLLLESSL | SSSEGEPEVE  | YKSLQWFGAT | VRAHGSSILA | CAPLYSWRTE  | KEPLSDPVTG  |            |
|          | 161  | CYLSTDNFTR  | ILEYAPCRSD  | FSWAAGQGYC  | QGGFSAEFTK  | TGRVVLGGPG | SYFWQGQILS | ATQEIAESY   | YPEYLINLVQ  |            |
|          | 241  | GQLQTRQASS  | IYDYSYLGYS  | VAVGEFSGDD  | TEDFVAGVPK  | GNLTYGYVTI | LNGSDIRSLY | NFSGEQMASY  | FGYAVAATDV  |            |
|          | 321  | NGDGLDLDLV  | GAPLLMDRTP  | DGRPQEVGRV  | YVYLQHPAGI  | EPTPTLTLTG | HDEFGRFGSS | LTPLGLDLDQ  | GYNDVAIGAP  |            |
|          | 401  | FGGETQQGVV  | FVFPGGPGLL  | GSKPSQVLQP  | LWAASHTPDF  | FGSALRGRD  | LDGNGYDPLI | VGSFGVDKAV  | VYGRPIVSA   |            |
|          | 481  | SASLTIFPAM  | FNPEERSCSL  | EGNPVACINL  | SFCLNASGKH  | VADSIGFTVE | LQLDWQKQK  | GVRRALFLAS  | TQATLTQTL   |            |
|          | 561  | IQNGAREDCR  | EMKIYLRNES  | EFRDKLSPIH  | IALNFSLDPQ  | APVDSHGLRP | ALHYQSKSRI | EDKAQILLDC  | GEDNICVPDL  |            |
|          | 641  | QLEVFGEQNH  | VYLGDKNALN  | LTFFHAQNVGE | GGAYEAELRV  | TAPPEAEYSG | LVRHPGNFSS | LSCDYFAVNQ  | SRLLVCDLGN  |            |
|          | 721  | PMKAGASLWG  | GLRFTVPHLR  | DTKKTIQFDF  | QILSKNLNNS  | QSDVVSFRLS | VEAQAQVTLN | GVSKPEAVLF  | PVSDWHPRDQ  |            |
|          | 801  | PQKEEDLGPA  | VHHVYELINQ  | GPSSISQGV   | ELSCPQALEG  | QQLLYVTRVT | GLNCTTNHPI | NPKGLELDPE  | GSLHHQQKRE  |            |
|          | 881  | APSRSSASSG  | PQILKCPAE   | CFRLRCELGP  | LHQQESQSLQ  | LHFRVWAKTF | LQREHQPFSL | QCEAVYKALK  | MPYRILPRQL  |            |
|          | 961  | PQKERQVATA  | VQWTKAEGSY  | GVPLWIIILA  | ILFGLLLLGL  | LIYIYKLG   | FKRSLPYGTA | MEKAQLKPPA  | TSDA        |            |

Supplemental Table S1: Relative Fluorescence Unit (RFU) signals of binding Gal8 to printed glycan array V3 at indicated concentrations of the lectin.

| Glycan number on the array | Glycan name                                                                                                                                                                                     | Gal8 Concentration (ug/ml) |          |          |          |          |          |          |          |          |          |          |          |          |          |          |          |
|----------------------------|-------------------------------------------------------------------------------------------------------------------------------------------------------------------------------------------------|----------------------------|----------|----------|----------|----------|----------|----------|----------|----------|----------|----------|----------|----------|----------|----------|----------|
|                            |                                                                                                                                                                                                 | 0.01                       |          | 0.05     |          | 0.1      |          | 0.2      |          | 0.5      |          | 1        |          | 2        |          | 5        |          |
|                            |                                                                                                                                                                                                 | Avg. RFU                   | Std Dev. | Avg. RFU | Std Dev. | Avg. RFU | Std Dev. | Avg. RFU | Std Dev. | Avg. RFU | Std Dev. | Avg. RFU | Std Dev. | Avg. RFU | Std Dev. | Avg. RFU | Std Dev. |
| 1                          | Neu5Ac $\alpha$ 2-8Neu5Ac $\alpha$ -Sp8                                                                                                                                                         | 468                        | 398      | 78       | 15       | 137      | 59       | 192      | 162      | 311      | 225      | 218      | 88       | 463      | 215      | 753      | 337      |
| 2                          | Neu5Ac $\alpha$ 2-8Neu5Ac $\beta$ -Sp17                                                                                                                                                         | 140                        | 14       | 200      | 48       | 159      | 45       | 146      | 37       | 283      | 116      | 275      | 81       | 472      | 74       | 675      | 167      |
| 3                          | Neu5Ac $\alpha$ 2-8Neu5Ac $\alpha$ 2-8Neu5Ac $\beta$ -Sp8                                                                                                                                       | 161                        | 78       | 118      | 34       | 118      | 38       | 89       | 46       | 485      | 384      | 178      | 57       | 168      | 63       | 418      | 172      |
| 4                          | Neu5Gc $\beta$ 2-6Gal $\beta$ 1-4GlcNAc-Sp8                                                                                                                                                     | 124                        | 59       | 127      | 58       | 131      | 107      | 201      | 51       | 211      | 43       | 157      | 72       | 256      | 43       | 230      | 39       |
| 5                          | Gal $\beta$ 1-3GlcNAc $\beta$ 1-2Man $\alpha$ 1-3(Gal $\beta$ 1-3GlcNAc $\beta$ 1-2Man $\alpha$ 1-6)Man $\beta$ 1-4GlcNAc $\beta$ 1-4GlcNAc $\beta$ -Sp19                                       | 131                        | 54       | 38       | 14       | 99       | 11       | 138      | 52       | 155      | 70       | 168      | 31       | 223      | 94       | 285      | 58       |
| 6                          | Neu5Ac $\alpha$ 2-6Gal $\beta$ 1-4GlcNAc $\beta$ 1-2Man $\alpha$ 1-3(Neu5Ac $\alpha$ 2-6Gal $\beta$ 1-4GlcNAc $\beta$ 1-2Man $\alpha$ 1-6)Man $\beta$ 1-4GlcNAc $\beta$ 1-4GlcNAc $\beta$ -Sp12 | 135                        | 39       | 121      | 62       | 166      | 94       | 120      | 28       | 171      | 34       | 139      | 25       | 212      | 94       | 303      | 85       |
| 7                          | $\alpha$ -D-Gal-Sp8                                                                                                                                                                             | 997                        | 539      | 663      | 518      | 544      | 270      | 661      | 299      | 495      | 201      | 525      | 230      | 1091     | 192      | 1911     | 517      |
| 8                          | $\alpha$ -D-Glc-Sp8                                                                                                                                                                             | 95                         | 39       | 127      | 10       | 332      | 322      | 193      | 80       | 258      | 135      | 514      | 156      | 1105     | 468      | 2687     | 1199     |
| 9                          | $\alpha$ -D-Man-Sp8                                                                                                                                                                             | 149                        | 124      | 66       | 24       | 129      | 69       | 111      | 25       | 133      | 28       | 315      | 120      | 248      | 144      | 508      | 294      |
| 10                         | $\alpha$ -GalNAc-Sp8                                                                                                                                                                            | 62                         | 22       | 88       | 48       | 246      | 236      | 158      | 11       | 110      | 65       | 89       | 56       | 97       | 28       | 413      | 163      |
| 11                         | $\alpha$ -L-Fuc-Sp8                                                                                                                                                                             | 108                        | 22       | 103      | 58       | 92       | 34       | 204      | 91       | 124      | 34       | 283      | 131      | 296      | 233      | 235      | 78       |
| 12                         | $\alpha$ -L-Fuc-Sp9                                                                                                                                                                             | 205                        | 157      | 98       | 72       | 578      | 643      | 80       | 32       | 150      | 59       | 222      | 104      | 366      | 162      | 1092     | 369      |
| 13                         | $\alpha$ -L-Rha-Sp8                                                                                                                                                                             | 7712                       | 815      | 7116     | 1003     | 6775     | 502      | 6334     | 361      | 6464     | 1668     | 5957     | 919      | 5511     | 3631     | 8353     | 755      |
| 14                         | $\alpha$ -Neu5Ac-Sp8                                                                                                                                                                            | 276                        | 97       | 128      | 55       | 756      | 396      | 74       | 12       | 295      | 81       | 388      | 106      | 544      | 141      | 401      | 113      |
| 15                         | $\alpha$ -Neu5Ac-Sp11                                                                                                                                                                           | 121                        | 47       | 137      | 8        | 143      | 60       | 118      | 34       | 129      | 37       | 241      | 68       | 299      | 35       | 936      | 245      |
| 16                         | $\beta$ -Neu5Ac-Sp8                                                                                                                                                                             | 173                        | 66       | 120      | 25       | 135      | 40       | 99       | 47       | 738      | 742      | 261      | 49       | 359      | 128      | 678      | 283      |
| 17                         | $\beta$ -D-Gal-Sp8                                                                                                                                                                              | 318                        | 118      | 332      | 85       | 307      | 187      | 521      | 29       | 576      | 151      | 421      | 101      | 977      | 136      | 1524     | 514      |
| 18                         | $\beta$ -D-Glc-Sp8                                                                                                                                                                              | 42                         | 51       | 179      | 127      | 152      | 71       | 128      | 52       | 405      | 130      | 441      | 130      | 256      | 40       | 849      | 246      |
| 19                         | $\beta$ -D-Man-Sp8                                                                                                                                                                              | 606                        | 608      | 295      | 314      | 197      | 100      | 209      | 67       | 320      | 218      | 228      | 65       | 1164     | 312      | 2168     | 365      |
| 20                         | $\beta$ -GalNAc-Sp8                                                                                                                                                                             | 104                        | 27       | 136      | 83       | 150      | 76       | 117      | 41       | 320      | 46       | 402      | 222      | 264      | 121      | 956      | 114      |
| 21                         | $\beta$ -GlcNAc-Sp0                                                                                                                                                                             | 209                        | 109      | 62       | 51       | 86       | 79       | 129      | 34       | 145      | 65       | 135      | 40       | 168      | 55       | 504      | 296      |
| 22                         | $\beta$ -GlcNAc-Sp8                                                                                                                                                                             | 112                        | 33       | 89       | 75       | 1203     | 1072     | 264      | 258      | 371      | 201      | 177      | 36       | 1504     | 1318     | 7047     | 2906     |
| 23                         | $\beta$ -GlcN(Gc)-Sp8                                                                                                                                                                           | 169                        | 94       | 261      | 66       | 85       | 30       | 147      | 78       | 59       | 10       | 158      | 87       | 420      | 186      | 226      | 195      |
| 24                         | (Gal $\beta$ 1-4GlcNAc) $\beta$ -3,6-GalNAc $\alpha$ -Sp8                                                                                                                                       | 87                         | 21       | 98       | 26       | 343      | 240      | 125      | 61       | 204      | 89       | 165      | 76       | 318      | 110      | 2397     | 1048     |
| 25                         | GlcNAc $\beta$ 1-3(GlcNAc $\beta$ 1-4)(GlcNAc $\beta$ 1-6)GlcNAc-Sp8                                                                                                                            | 165                        | 35       | 144      | 23       | 129      | 44       | 186      | 73       | 207      | 88       | 230      | 69       | 437      | 304      | 481      | 124      |
| 26                         | [3OSO3][6OSO3]Gal $\beta$ 1-4[6OSO3]GlcNAc $\beta$ -Sp0                                                                                                                                         | 784                        | 347      | 723      | 17       | 1061     | 595      | 634      | 65       | 1149     | 512      | 1448     | 427      | 2219     | 1480     | 7059     | 1897     |
| 27                         | [3OSO3][6OSO3]Gal $\beta$ 1-4GlcNAc $\beta$ -Sp0                                                                                                                                                | 290                        | 89       | 251      | 52       | 173      | 57       | 229      | 67       | 194      | 58       | 183      | 36       | 251      | 63       | 428      | 74       |
| 28                         | [3OSO3]Gal $\beta$ 1-4Glc $\beta$ -Sp8                                                                                                                                                          | 384                        | 77       | 1221     | 262      | 1274     | 785      | 5027     | 865      | 4018     | 771      | 7985     | 4472     | 25164    | 22564    | 56244    | 11783    |
| 29                         | [3OSO3]Gal $\beta$ 1-4(6OSO3)Glc $\beta$ -Sp0                                                                                                                                                   | 2594                       | 1262     | 15762    | 1798     | 24314    | 12977    | 46522    | 11291    | 21238    | 13034    | 44440    | 12381    | 42093    | 1359     | 47043    | 3102     |
| 30                         | [3OSO3]Gal $\beta$ 1-4(6OSO3)Glc $\beta$ -Sp8                                                                                                                                                   | 5253                       | 421      | 13422    | 1341     | 33041    | 4643     | 41743    | 8069     | 34744    | 4232     | 34310    | 2734     | 41137    | 2938     | 40979    | 3295     |
| 31                         | [3OSO3]Gal $\beta$ 1-3(Fuca1-4)GlcNAc $\beta$ -Sp8                                                                                                                                              | 83                         | 31       | 136      | 37       | 190      | 61       | 154      | 50       | 296      | 86       | 290      | 121      | 253      | 99       | 921      | 190      |
| 32                         | [3OSO3]Gal $\beta$ 1-3GalNAc $\alpha$ -Sp8                                                                                                                                                      | 505                        | 183      | 1004     | 222      | 5893     | 829      | 3354     | 279      | 8199     | 1875     | 5757     | 1178     | 15995    | 3744     | 44650    | 3776     |
| 33                         | [3OSO3]Gal $\beta$ 1-3GlcNAc $\beta$ -Sp8                                                                                                                                                       | 507                        | 221      | 1609     | 307      | 5193     | 2521     | 5566     | 963      | 12247    | 3062     | 5909     | 1093     | 18578    | 4499     | 41230    | 6447     |
| 34                         | [3OSO3]Gal $\beta$ 1-4(Fuca1-3)GlcNAc $\beta$ -Sp8                                                                                                                                              | 116                        | 109      | 112      | 58       | 245      | 93       | 106      | 23       | 174      | 22       | 153      | 55       | 308      | 165      | 324      | 157      |
| 35                         | [3OSO3]Gal $\beta$ 1-4[6OSO3]GlcNAc $\beta$ -Sp8                                                                                                                                                | 887                        | 164      | 2697     | 468      | 6169     | 1508     | 9191     | 872      | 18380    | 5499     | 31206    | 3739     | 40549    | 13155    | 41072    | 5505     |
| 36                         | [3OSO3]Gal $\beta$ 1-4GlcNAc $\beta$ -Sp0                                                                                                                                                       | 162                        | 77       | 302      | 95       | 653      | 223      | 534      | 120      | 1020     | 425      | 949      | 521      | 2351     | 796      | 16561    | 5667     |
| 37                         | [3OSO3]Gal $\beta$ 1-4GlcNAc $\beta$ -Sp8                                                                                                                                                       | 160                        | 36       | 212      | 101      | 332      | 105      | 473      | 93       | 520      | 108      | 841      | 115      | 2117     | 227      | 8099     | 1874     |
| 38                         | [3OSO3]Gal $\beta$ -Sp8                                                                                                                                                                         | 370                        | 97       | 103      | 21       | 335      | 386      | 143      | 96       | 406      | 211      | 525      | 192      | 506      | 285      | 1340     | 181      |
| 39                         | [4OSO3][6OSO3]Gal $\beta$ 1-4GlcNAc $\beta$ -Sp0                                                                                                                                                | 631                        | 47       | 532      | 117      | 708      | 156      | 700      | 180      | 660      | 364      | 802      | 119      | 1151     | 29       | 1772     | 162      |
| 40                         | [4OSO3]Gal $\beta$ 1-4GlcNAc $\beta$ -Sp8                                                                                                                                                       | 163                        | 99       | 130      | 98       | 160      | 97       | 175      | 65       | 530      | 519      | 859      | 872      | 676      | 418      | 1084     | 440      |
| 41                         | 6-H <sub>2</sub> PO <sub>3</sub> Man $\alpha$ -Sp8                                                                                                                                              | 385                        | 213      | 532      | 255      | 249      | 174      | 387      | 186      | 315      | 68       | 682      | 417      | 436      | 192      | 1367     | 522      |
| 42                         | [6OSO3]Gal $\beta$ 1-4Glc $\beta$ -Sp0                                                                                                                                                          | 214                        | 185      | 93       | 21       | 247      | 124      | 162      | 138      | 211      | 56       | 275      | 105      | 469      | 130      | 715      | 451      |
| 43                         | [6OSO3]Gal $\beta$ 1-4Glc $\beta$ -Sp8                                                                                                                                                          | 109                        | 40       | 179      | 18       | 381      | 97       | 228      | 114      | 326      | 87       | 324      | 29       | 769      | 300      | 2693     | 1443     |
| 44                         | [6OSO3]Gal $\beta$ 1-4GlcNAc $\beta$ -Sp8                                                                                                                                                       | 145                        | 44       | 180      | 83       | 378      | 360      | 141      | 40       | 255      | 165      | 257      | 116      | 257      | 83       | 949      | 378      |
| 45                         | [6OSO3]Gal $\beta$ 1-4[6OSO3]Glc $\beta$ -Sp8                                                                                                                                                   | 356                        | 61       | 184      | 86       | 561      | 93       | 166      | 30       | 622      | 181      | 1180     | 107      | 983      | 373      | 3058     | 1330     |
| 46                         | NeuAc $\alpha$ 2-3[6OSO3]Gal $\beta$ 1-4GlcNAc $\beta$ -Sp8                                                                                                                                     | 150                        | 84       | 123      | 49       | 1970     | 1726     | 201      | 98       | 464      | 265      | 482      | 157      | 642      | 739      | 1323     | 514      |
| 47                         | [6OSO3]GlcNAc $\beta$ -Sp8                                                                                                                                                                      | 242                        | 101      | 301      | 120      | 447      | 205      | 239      | 80       | 656      | 98       | 548      | 89       | 684      | 132      | 2068     | 646      |
| 48                         | 9NAcNeu5Ac $\alpha$ -Sp8                                                                                                                                                                        | 92                         | 11       | 142      | 31       | 638      | 396      | 261      | 231      | 434      | 325      | 362      | 77       | 317      | 127      | 941      | 617      |
| 49                         | 9NAcNeu5Ac $\alpha$ 2-6Gal $\beta$ 1-4GlcNAc $\beta$ -Sp8                                                                                                                                       | 65                         | 16       | 178      | 69       | 268      | 107      | 205      | 71       | 226      | 36       | 207      | 70       | 229      | 72       | 534      | 157      |

|     |                                                                                                     |      |      |       |      |       |       |       |       |       |       |       |       |       |       |       |       |
|-----|-----------------------------------------------------------------------------------------------------|------|------|-------|------|-------|-------|-------|-------|-------|-------|-------|-------|-------|-------|-------|-------|
| 50  | Mana1-3(Mana1-6)Manβ1-4GlcNAcβ1-4GlcNAcβ-Sp13                                                       | 83   | 8    | 71    | 29   | 103   | 21    | 152   | 74    | 166   | 28    | 156   | 58    | 408   | 542   | 333   | 175   |
| 51  | GlcNAcβ1-2Mana1-3(GlcNAcβ1-2Mana1-6)Manβ1-4GlcNAcβ1-4GlcNAcβ-Sp13                                   | 90   | 24   | 96    | 55   | 140   | 59    | 67    | 37    | 208   | 100   | 126   | 40    | 263   | 44    | 504   | 220   |
| 52  | Galβ1-4GlcNAcβ1-2Mana1-3(Galβ1-4GlcNAcβ1-2Mana1-6)Manβ1-4GlcNAcβ1-4GlcNAcβ-Sp13                     | 94   | 42   | 55    | 6    | 185   | 132   | 184   | 80    | 128   | 56    | 266   | 63    | 283   | 161   | 597   | 196   |
| 53  | Neu5Aca2-6Galβ1-4GlcNAcβ1-2Mana1-3(Neu5Aca2-6Galβ1-4GlcNAcβ1-2Mana1-6)Manβ1-4GlcNAcβ1-4GlcNAcβ-Sp13 | 87   | 21   | 77    | 54   | 483   | 251   | 125   | 39    | 205   | 54    | 267   | 143   | 163   | 25    | 266   | 32    |
| 54  | Neu5Aca2-6Galβ1-4GlcNAcβ1-2Mana1-3(Neu5Aca2-6Galβ1-4GlcNAcβ1-2Mana1-6)Manβ1-4GlcNAcβ1-4GlcNAcβ-Sp8  | 164  | 83   | 423   | 238  | 295   | 87    | 189   | 235   | 187   | 7     | 260   | 210   | 233   | 49    | 583   | 422   |
| 55  | Fuca1-2Galβ1-3GalNAcβ1-3Galα-Sp9                                                                    | 294  | 43   | 131   | 55   | 110   | 43    | 171   | 78    | 124   | 78    | 140   | 19    | 287   | 172   | 516   | 281   |
| 56  | Fuca1-2Galβ1-3GalNAcβ1-3Galα1-4Galβ1-4Glcβ-Sp9                                                      | 548  | 30   | 621   | 21   | 859   | 303   | 705   | 64    | 785   | 88    | 886   | 92    | 899   | 53    | 1246  | 184   |
| 57  | Fuca1-2Galβ1-3(Fuca1-4)GlcNAcβ-Sp8                                                                  | 164  | 65   | 160   | 43   | 108   | 25    | 166   | 76    | 159   | 46    | 132   | 59    | 168   | 56    | 523   | 89    |
| 58  | Fuca1-2Galβ1-3GalNAcα-Sp8                                                                           | 104  | 49   | 90    | 47   | 351   | 135   | 185   | 59    | 222   | 33    | 175   | 81    | 538   | 205   | 1906  | 445   |
| 59  | Fuca1-2Galβ1-3GalNAcβ1-4(Neu5Aca2-3)Galβ1-4Glcβ-Sp0                                                 | 118  | 9    | 180   | 95   | 176   | 87    | 196   | 49    | 217   | 39    | 257   | 82    | 529   | 215   | 1510  | 211   |
| 60  | Fuca1-2Galβ1-3GalNAcβ1-4(Neu5Aca2-3)Galβ1-4Glcβ-Sp9                                                 | 218  | 51   | 133   | 44   | 563   | 323   | 185   | 120   | 390   | 117   | 351   | 43    | 784   | 100   | 1922  | 786   |
| 61  | Fuca1-2Galβ1-3GlcNAcβ1-3Galβ1-4Glcβ-Sp10                                                            | 1222 | 35   | 1180  | 117  | 1748  | 226   | 1757  | 95    | 2093  | 175   | 2714  | 353   | 11618 | 1977  | 30782 | 3206  |
| 62  | Fuca1-2Galβ1-3GlcNAcβ1-3Galβ1-4Glcβ-Sp8                                                             | 1498 | 69   | 1745  | 84   | 1521  | 367   | 1705  | 195   | 1929  | 425   | 2798  | 445   | 5284  | 3618  | 34073 | 18292 |
| 63  | Fuca1-2Galβ1-3GlcNAcβ-Sp0                                                                           | 174  | 34   | 233   | 73   | 489   | 96    | 556   | 80    | 666   | 221   | 1529  | 385   | 1983  | 688   | 6450  | 2449  |
| 64  | Fuca1-2Galβ1-3GlcNAcβ-Sp8                                                                           | 113  | 59   | 87    | 45   | 301   | 68    | 339   | 92    | 174   | 239   | 950   | 570   | 1723  | 265   | 3550  | 2786  |
| 65  | Fuca1-2Galβ1-4(Fuca1-3)GlcNAcβ1-3Galβ1-4(Fuca1-3)GlcNAcβ-Sp0                                        | 599  | 526  | 181   | 111  | 338   | 240   | 129   | 45    | 192   | 44    | 227   | 27    | 297   | 79    | 932   | 628   |
| 66  | Fuca1-2Galβ1-4(Fuca1-3)GlcNAcβ1-3Galβ1-4(Fuca1-3)GlcNAcβ1-3Galβ1-4(Fuca1-3)GlcNAcβ-Sp0              | 233  | 91   | 169   | 32   | 237   | 33    | 132   | 50    | 186   | 23    | 257   | 48    | 402   | 159   | 752   | 464   |
| 67  | Fuca1-2Galβ1-4(Fuca1-3)GlcNAcβ-Sp0                                                                  | 103  | 89   | 61    | 24   | 178   | 70    | 98    | 12    | 247   | 119   | 285   | 124   | 413   | 34    | 3744  | 2330  |
| 68  | Fuca1-2Galβ1-4(Fuca1-3)GlcNAcβ-Sp8                                                                  | 135  | 55   | 181   | 100  | 322   | 103   | 216   | 128   | 141   | 18    | 158   | 45    | 505   | 209   | 486   | 89    |
| 69  | Fuca1-2Galβ1-4GlcNAcβ1-3Galβ1-4GlcNAc-Sp0                                                           | 245  | 77   | 162   | 48   | 354   | 84    | 499   | 124   | 1149  | 201   | 1028  | 322   | 2581  | 616   | 27991 | 3264  |
| 70  | Fuca1-2Galβ1-4GlcNAcβ1-3Galβ1-4GlcNAcβ1-3Galβ1-4GlcNAcβ-Sp0                                         | 174  | 37   | 367   | 55   | 1634  | 446   | 885   | 199   | 2394  | 705   | 1936  | 923   | 7934  | 1165  | 43846 | 1537  |
| 71  | Fuca1-2Galβ1-4GlcNAcβ-Sp0                                                                           | 249  | 114  | 101   | 27   | 223   | 97    | 151   | 45    | 431   | 304   | 457   | 71    | 278   | 103   | 1061  | 226   |
| 72  | Fuca1-2Galβ1-4GlcNAcβ-Sp8                                                                           | 128  | 47   | 76    | 18   | 239   | 42    | 166   | 22    | 564   | 165   | 333   | 65    | 676   | 48    | 3681  | 1490  |
| 73  | Fuca1-2Galβ1-4Glcβ-Sp0                                                                              | 442  | 79   | 504   | 142  | 688   | 142   | 923   | 99    | 1236  | 57    | 1110  | 586   | 2963  | 1490  | 9819  | 3932  |
| 74  | Fuca1-2Galβ-Sp8                                                                                     | 500  | 77   | 627   | 29   | 500   | 87    | 413   | 129   | 460   | 315   | 627   | 138   | 864   | 159   | 715   | 372   |
| 75  | Fuca1-3GlcNAcβ-Sp8                                                                                  | 293  | 23   | 241   | 55   | 272   | 67    | 297   | 14    | 270   | 31    | 439   | 122   | 849   | 156   | 1784  | 229   |
| 76  | Fuca1-3GlcNAcβ-Sp8                                                                                  | 424  | 59   | 418   | 84   | 235   | 119   | 300   | 28    | 614   | 185   | 669   | 160   | 896   | 154   | 1486  | 231   |
| 77  | Fuca1-4GlcNAcβ-Sp8                                                                                  | 1371 | 1297 | 331   | 220  | 515   | 353   | 178   | 67    | 5821  | 6471  | 1755  | 1720  | 2588  | 3633  | 12196 | 12456 |
| 78  | Fucβ1-3GlcNAcβ-Sp8                                                                                  | 123  | 37   | 82    | 5    | 94    | 48    | 97    | 40    | 176   | 35    | 170   | 91    | 254   | 71    | 1287  | 662   |
| 79  | GalNAca1-3(Fuca1-2)Galβ1-3GlcNAcβ-Sp0                                                               | 344  | 74   | 943   | 96   | 10991 | 1623  | 3214  | 254   | 19935 | 1754  | 49337 | 10475 | 48735 | 9565  | 44160 | 1442  |
| 80  | GalNAca1-3(Fuca1-2)Galβ1-4(Fuca1-3)GlcNAcβ-Sp0                                                      | 138  | 47   | 182   | 130  | 298   | 96    | 203   | 56    | 262   | 131   | 236   | 77    | 266   | 32    | 507   | 190   |
| 81  | GalNAca1-3(Fuca1-2)Galβ1-4GlcNAcβ-Sp0                                                               | 235  | 58   | 1071  | 84   | 4813  | 1604  | 4128  | 341   | 22759 | 5334  | 37610 | 16924 | 46730 | 10235 | 48513 | 1880  |
| 82  | GalNAca1-3(Fuca1-2)Galβ1-4GlcNAcβ-Sp8                                                               | 391  | 152  | 1124  | 69   | 4529  | 1438  | 4819  | 597   | 20600 | 3434  | 37793 | 6448  | 46251 | 9645  | 46301 | 1845  |
| 83  | GalNAca1-3(Fuca1-2)Galβ1-4Glcβ-Sp0                                                                  | 372  | 85   | 1062  | 131  | 3230  | 455   | 3713  | 407   | 20662 | 3328  | 34096 | 1867  | 37882 | 1104  | 46599 | 2602  |
| 84  | GalNAca1-3(Fuca1-2)Galβ-Sp8                                                                         | 133  | 56   | 116   | 13   | 276   | 55    | 234   | 110   | 250   | 30    | 341   | 100   | 726   | 614   | 575   | 250   |
| 85  | GalNAca1-3GalNAcβ-Sp8                                                                               | 294  | 135  | 491   | 25   | 658   | 86    | 358   | 125   | 1103  | 540   | 972   | 92    | 1099  | 232   | 1721  | 307   |
| 86  | GalNAca1-3Galβ-Sp8                                                                                  | 384  | 71   | 443   | 62   | 520   | 57    | 336   | 27    | 533   | 135   | 690   | 214   | 1049  | 410   | 1172  | 194   |
| 87  | GalNAca1-4(Fuca1-2)Galβ1-4GlcNAcβ-Sp8                                                               | 214  | 88   | 212   | 94   | 153   | 21    | 139   | 38    | 506   | 251   | 463   | 45    | 1879  | 1630  | 2067  | 1108  |
| 88  | GalNAcβ1-3GalNAcα-Sp8                                                                               | 104  | 91   | 117   | 31   | 129   | 123   | 210   | 57    | 222   | 128   | 162   | 16    | 496   | 169   | 1554  | 708   |
| 89  | GalNAcβ1-3(Fuca1-2)Galβ-Sp8                                                                         | 299  | 355  | 112   | 48   | 165   | 43    | 147   | 42    | 210   | 59    | 329   | 118   | 732   | 237   | 1615  | 650   |
| 90  | GalNAcβ1-3Galα1-4Galβ1-4GlcNAcβ-Sp0                                                                 | 780  | 28   | 708   | 85   | 506   | 246   | 885   | 49    | 824   | 105   | 881   | 71    | 947   | 84    | 999   | 123   |
| 91  | GalNAcβ1-4(Fuca1-3)GlcNAcβ-Sp0                                                                      | 138  | 30   | 179   | 116  | 97    | 40    | 185   | 56    | 178   | 30    | 139   | 27    | 285   | 151   | 383   | 131   |
| 92  | GalNAcβ1-4GlcNAcβ-Sp0                                                                               | 1189 | 1116 | 447   | 400  | 97    | 29    | 154   | 88    | 188   | 48    | 245   | 60    | 309   | 96    | 2656  | 1414  |
| 93  | GalNAcβ1-4GlcNAcβ-Sp8                                                                               | 45   | 36   | 97    | 14   | 153   | 68    | 169   | 57    | 316   | 72    | 279   | 98    | 504   | 126   | 2046  | 488   |
| 94  | Galα1-2Galβ-Sp8                                                                                     | 398  | 89   | 369   | 185  | 347   | 95    | 448   | 114   | 509   | 112   | 616   | 228   | 817   | 364   | 1520  | 823   |
| 95  | Galα1-3(Fuca1-2)Galβ1-3GlcNAcβ-Sp0                                                                  | 1398 | 322  | 5848  | 929  | 16933 | 5801  | 19120 | 2642  | 40214 | 5551  | 38794 | 1393  | 42448 | 2397  | 46231 | 639   |
| 96  | Galα1-3(Fuca1-2)Galβ1-4(Fuca1-3)GlcNAcβ-Sp0                                                         | 129  | 18   | 121   | 42   | 181   | 78    | 161   | 68    | 423   | 91    | 247   | 67    | 517   | 489   | 1189  | 553   |
| 97  | Galα1-3(Fuca1-2)Galβ1-4GlcNAc-Sp0                                                                   | 1135 | 161  | 3883  | 481  | 13778 | 5694  | 18278 | 2300  | 47343 | 11829 | 40787 | 4546  | 44996 | 443   | 47463 | 662   |
| 98  | Galα1-3(Fuca1-2)Galβ1-4Glcβ-Sp0                                                                     | 4156 | 785  | 13998 | 1363 | 49770 | 15118 | 47012 | 12222 | 34394 | 1511  | 37604 | 3058  | 47223 | 5069  | 48329 | 2536  |
| 99  | Galα1-3(Fuca1-2)Galβ-Sp8                                                                            | 271  | 157  | 237   | 45   | 242   | 65    | 165   | 49    | 470   | 91    | 338   | 107   | 632   | 590   | 942   | 533   |
| 100 | Galα1-3(Galα1-4)Galβ1-4GlcNAcβ-Sp8                                                                  | 192  | 13   | 146   | 47   | 145   | 56    | 263   | 101   | 239   | 149   | 237   | 69    | 308   | 144   | 532   | 167   |
| 101 | Galα1-3GalNAcα-Sp8                                                                                  | 66   | 22   | 78    | 25   | 141   | 45    | 104   | 6     | 168   | 69    | 125   | 44    | 101   | 73    | 330   | 200   |
| 102 | Galα1-3GalNAcβ-Sp8                                                                                  | 147  | 47   | 176   | 46   | 160   | 27    | 262   | 136   | 250   | 52    | 312   | 92    | 377   | 142   | 450   | 177   |
| 103 | Galα1-3Galβ1-4(Fuca1-3)GlcNAcβ-Sp8                                                                  | 111  | 42   | 86    | 29   | 152   | 54    | 145   | 73    | 133   | 33    | 326   | 190   | 491   | 50    | 933   | 431   |

|     |                                                                                                     |      |      |       |      |       |       |       |      |       |       |       |       |       |       |       |       |
|-----|-----------------------------------------------------------------------------------------------------|------|------|-------|------|-------|-------|-------|------|-------|-------|-------|-------|-------|-------|-------|-------|
| 104 | Galα1-3Galβ1-3GlcNAcβ-Sp0                                                                           | 118  | 40   | 111   | 65   | 392   | 173   | 261   | 114  | 200   | 126   | 213   | 77    | 695   | 399   | 4781  | 995   |
| 105 | Galα1-3Galβ1-4GlcNAcβ-Sp8                                                                           | 78   | 14   | 55    | 19   | 291   | 280   | 301   | 83   | 415   | 183   | 355   | 271   | 751   | 346   | 7964  | 1686  |
| 106 | Galα1-3Galβ1-4Glcβ-Sp0                                                                              | 556  | 785  | 214   | 116  | 1136  | 469   | 410   | 112  | 1025  | 432   | 634   | 102   | 1725  | 674   | 14961 | 8976  |
| 107 | Galα1-3Galβ-Sp8                                                                                     | 116  | 28   | 336   | 104  | 386   | 121   | 527   | 130  | 407   | 210   | 808   | 105   | 753   | 563   | 1646  | 1399  |
| 108 | Galα1-4(Fuca1-2)Galβ1-4GlcNAcβ-Sp8                                                                  | 225  | 37   | 169   | 41   | 257   | 44    | 197   | 121  | 252   | 17    | 322   | 87    | 252   | 46    | 405   | 87    |
| 109 | Galα1-4Galβ1-4GlcNAcβ-Sp0                                                                           | 578  | 157  | 426   | 54   | 440   | 95    | 234   | 109  | 665   | 426   | 642   | 177   | 841   | 362   | 1147  | 422   |
| 110 | Galα1-4Galβ1-4GlcNAcβ-Sp8                                                                           | 558  | 46   | 422   | 81   | 2245  | 1851  | 579   | 103  | 796   | 72    | 905   | 149   | 978   | 82    | 1600  | 558   |
| 111 | Galα1-4Galβ1-4Glcβ-Sp0                                                                              | 737  | 319  | 742   | 94   | 487   | 293   | 582   | 90   | 759   | 193   | 622   | 219   | 1125  | 307   | 2004  | 487   |
| 112 | Galα1-4GlcNAcβ-Sp8                                                                                  | 171  | 40   | 309   | 40   | 222   | 75    | 307   | 73   | 488   | 223   | 394   | 201   | 584   | 74    | 1792  | 482   |
| 113 | Galα1-6Glcβ-Sp8                                                                                     | 1141 | 618  | 2244  | 41   | 2033  | 215   | 1697  | 98   | 1614  | 176   | 2226  | 255   | 1534  | 459   | 1374  | 1202  |
| 114 | Galβ1-2Galβ-Sp8                                                                                     | 261  | 113  | 192   | 75   | 313   | 67    | 363   | 132  | 381   | 110   | 630   | 309   | 829   | 340   | 1426  | 559   |
| 115 | Galβ1-3(Fuca1-4)GlcNAcβ1-3Galβ1-4(Fuca1-3)GlcNAcβ-Sp0                                               | 141  | 24   | 217   | 49   | 215   | 90    | 162   | 30   | 258   | 36    | 351   | 87    | 251   | 58    | 585   | 298   |
| 116 | Galβ1-3(Fuca1-4)GlcNAcβ1-3Galβ1-4GlcNAcβ-Sp0                                                        | 1779 | 1531 | 567   | 633  | 145   | 49    | 128   | 17   | 172   | 82    | 357   | 80    | 218   | 37    | 1289  | 254   |
| 117 | Galβ1-3(Fuca1-4)GlcNAc-Sp0                                                                          | 118  | 19   | 210   | 106  | 167   | 79    | 111   | 49   | 233   | 144   | 159   | 64    | 210   | 46    | 396   | 223   |
| 118 | Galβ1-3(Fuca1-4)GlcNAc-Sp8                                                                          | 425  | 337  | 227   | 98   | 204   | 62    | 131   | 35   | 193   | 155   | 397   | 114   | 459   | 153   | 838   | 413   |
| 119 | Galβ1-3(Fuca1-4)GlcNAcβ-Sp8                                                                         | 145  | 51   | 290   | 191  | 287   | 30    | 156   | 112  | 228   | 91    | 282   | 42    | 341   | 195   | 417   | 104   |
| 120 | Galβ1-3(Galβ1-4GlcNAcβ1-6)GalNAcα-Sp8                                                               | 105  | 56   | 111   | 51   | 143   | 87    | 143   | 32   | 339   | 189   | 454   | 402   | 1052  | 214   | 1396  | 417   |
| 121 | Galβ1-3(GlcNAcβ1-6)GalNAcα-Sp8                                                                      | 225  | 114  | 114   | 65   | 272   | 254   | 117   | 35   | 227   | 39    | 325   | 95    | 795   | 228   | 2014  | 387   |
| 122 | Galβ1-3(Neu5Acα2-6)GalNAcα-Sp8                                                                      | 75   | 24   | 113   | 27   | 209   | 16    | 118   | 27   | 214   | 44    | 196   | 16    | 223   | 91    | 464   | 264   |
| 123 | Galβ1-3(Neu5Acβ2-6)GalNAcα-Sp8                                                                      | 146  | 65   | 90    | 41   | 206   | 72    | 100   | 22   | 470   | 151   | 423   | 142   | 441   | 150   | 1078  | 770   |
| 124 | Galβ1-3(Neu5Acα2-6)GlcNAcβ1-4Galβ1-4Glcβ-Sp10                                                       | 391  | 66   | 251   | 81   | 571   | 124   | 496   | 100  | 632   | 137   | 797   | 119   | 1915  | 187   | 1461  | 239   |
| 125 | Galβ1-3GalNAcα-Sp8                                                                                  | 139  | 37   | 117   | 50   | 254   | 85    | 108   | 68   | 169   | 71    | 400   | 158   | 801   | 224   | 712   | 339   |
| 126 | Galβ1-3GalNAcβ-Sp8                                                                                  | 187  | 61   | 340   | 52   | 263   | 29    | 640   | 102  | 435   | 288   | 1104  | 256   | 2764  | 1258  | 3077  | 1709  |
| 127 | Galβ1-3GalNAcβ1-3Galα1-4Galβ1-4Glcβ-Sp0                                                             | 828  | 177  | 880   | 87   | 1008  | 165   | 874   | 73   | 980   | 61    | 1289  | 138   | 1486  | 150   | 2013  | 478   |
| 128 | Galβ1-3GalNAcβ1-4(Neu5Acα2-3)Galβ1-4Glcβ-Sp0                                                        | 1799 | 1185 | 472   | 467  | 440   | 85    | 358   | 109  | 855   | 378   | 731   | 352   | 1725  | 335   | 18122 | 10245 |
| 129 | Galβ1-3GalNAcβ1-4Galβ1-4Glcβ-Sp8                                                                    | 421  | 424  | 194   | 16   | 204   | 53    | 219   | 44   | 743   | 165   | 426   | 100   | 879   | 268   | 7272  | 1890  |
| 130 | Galβ1-3Galβ-Sp8                                                                                     | 268  | 78   | 162   | 44   | 461   | 52    | 285   | 49   | 404   | 115   | 491   | 173   | 1782  | 663   | 6399  | 1182  |
| 131 | Galβ1-3GlcNAcβ1-3Galβ1-4GlcNAcβ-Sp0                                                                 | 108  | 45   | 98    | 35   | 213   | 29    | 135   | 47   | 290   | 100   | 110   | 62    | 348   | 104   | 3621  | 332   |
| 132 | Galβ1-3GlcNAcβ1-3Galβ1-4Glcβ-Sp10                                                                   | 1243 | 76   | 1279  | 297  | 1569  | 126   | 1622  | 196  | 2454  | 343   | 1766  | 174   | 2695  | 135   | 23845 | 6415  |
| 133 | Galβ1-3GlcNAcβ-Sp0                                                                                  | 79   | 58   | 107   | 69   | 359   | 278   | 168   | 90   | 323   | 124   | 259   | 130   | 457   | 237   | 2450  | 521   |
| 134 | Galβ1-3GlcNAcβ-Sp8                                                                                  | 108  | 39   | 142   | 23   | 79    | 49    | 107   | 28   | 151   | 68    | 328   | 273   | 396   | 275   | 1611  | 305   |
| 135 | Galβ1-4(Fuca1-3)GlcNAcβ-Sp0                                                                         | 165  | 81   | 138   | 67   | 396   | 237   | 88    | 24   | 469   | 468   | 381   | 182   | 226   | 69    | 514   | 279   |
| 136 | Galβ1-4(Fuca1-3)GlcNAcβ-Sp8                                                                         | 47   | 16   | 113   | 41   | 168   | 76    | 81    | 52   | 86    | 17    | 173   | 84    | 300   | 135   | 1071  | 720   |
| 137 | Galβ1-4(Fuca1-3)GlcNAcβ1-4Galβ1-4(Fuca1-3)GlcNAcβ-Sp0                                               | 260  | 101  | 162   | 56   | 126   | 16    | 168   | 45   | 727   | 848   | 206   | 66    | 294   | 45    | 788   | 81    |
| 138 | Galβ1-4(Fuca1-3)GlcNAcβ1-4Galβ1-4(Fuca1-3)GlcNAcβ1-4Galβ1-4(Fuca1-3)GlcNAcβ-Sp0                     | 119  | 23   | 116   | 25   | 207   | 33    | 251   | 87   | 331   | 93    | 357   | 84    | 1496  | 552   | 3122  | 969   |
| 139 | Galβ1-4[6OSO3]Glcβ-Sp0                                                                              | 212  | 61   | 682   | 128  | 824   | 500   | 1557  | 346  | 2500  | 689   | 2572  | 683   | 14963 | 10214 | 7755  | 5854  |
| 140 | Galβ1-4[6OSO3]Glcβ-Sp8                                                                              | 431  | 171  | 430   | 108  | 636   | 510   | 1456  | 113  | 740   | 702   | 2632  | 594   | 10378 | 2737  | 14040 | 4513  |
| 141 | Galβ1-4GalNAcα1-3(Fuca1-2)Galβ1-4GlcNAcβ-Sp8                                                        | 241  | 73   | 509   | 57   | 836   | 97    | 1268  | 112  | 1633  | 172   | 5314  | 906   | 41158 | 1134  | 44984 | 1239  |
| 142 | Galβ1-4GalNAcβ1-3(Fuca1-2)Galβ1-4GlcNAcβ-Sp8                                                        | 348  | 65   | 340   | 52   | 169   | 31    | 373   | 97   | 223   | 127   | 319   | 81    | 301   | 35    | 533   | 211   |
| 143 | Neu5Acα2-3Galβ1-4GlcNAcβ1-2Manα1-3(Neu5Acα2-3Galβ1-4GlcNAcβ1-2Manα1-6)Manβ1-4GlcNAcβ1-4GlcNAcβ-Sp12 | 71   | 36   | 113   | 44   | 300   | 17    | 263   | 26   | 440   | 42    | 993   | 102   | 1316  | 109   | 1863  | 251   |
| 144 | Galβ1-4GlcNAcβ1-3GalNAcα-Sp8                                                                        | 73   | 7    | 65    | 19   | 96    | 30    | 84    | 39   | 357   | 424   | 374   | 160   | 1419  | 943   | 2028  | 664   |
| 145 | Galβ1-4GlcNAcβ1-3Galβ1-4(Fuca1-3)GlcNAcβ1-3Galβ1-4(Fuca1-3)GlcNAcβ-Sp0                              | 138  | 37   | 232   | 187  | 262   | 93    | 273   | 133  | 379   | 61    | 388   | 83    | 475   | 96    | 2654  | 163   |
| 146 | Galβ1-4GlcNAcβ1-3Galβ1-4GlcNAcβ1-3Galβ1-4GlcNAcβ-Sp0                                                | 167  | 30   | 1065  | 87   | 3262  | 687   | 3033  | 341  | 8775  | 1416  | 6183  | 803   | 44497 | 10892 | 46294 | 1513  |
| 147 | Galβ1-4GlcNAcβ1-3Galβ1-4GlcNAcβ-Sp0                                                                 | 341  | 106  | 798   | 100  | 2646  | 144   | 3418  | 368  | 12446 | 4069  | 13151 | 4367  | 35016 | 3643  | 46848 | 3270  |
| 148 | Galβ1-4GlcNAcβ1-3Galβ1-4Glcβ-Sp0                                                                    | 2484 | 255  | 10761 | 1930 | 38853 | 16934 | 33517 | 2863 | 53834 | 10825 | 48378 | 10407 | 45937 | 1346  | 44991 | 2961  |
| 149 | Galβ1-4GlcNAcβ1-3Galβ1-4Glcβ-Sp8                                                                    | 2751 | 596  | 8277  | 882  | 39022 | 7170  | 39702 | 2491 | 46009 | 10401 | 39630 | 1907  | 44337 | 2383  | 50875 | 4340  |
| 150 | Galβ1-4GlcNAcβ1-6(Galβ1-3)GalNAcα-Sp8                                                               | 231  | 130  | 114   | 43   | 190   | 43    | 228   | 37   | 522   | 95    | 221   | 70    | 1484  | 237   | 2350  | 1037  |
| 151 | Galβ1-4GlcNAcβ1-6GalNAcα-Sp8                                                                        | 112  | 34   | 191   | 70   | 143   | 82    | 118   | 78   | 208   | 56    | 297   | 100   | 340   | 143   | 721   | 302   |
| 152 | Galβ1-4GlcNAcβ-Sp0                                                                                  | 177  | 23   | 91    | 32   | 160   | 130   | 132   | 53   | 159   | 53    | 267   | 107   | 223   | 92    | 648   | 247   |
| 153 | Galβ1-4GlcNAcβ-Sp8                                                                                  | 149  | 53   | 97    | 54   | 103   | 26    | 275   | 111  | 193   | 50    | 529   | 62    | 636   | 77    | 1624  | 287   |
| 154 | Galβ1-4Glcβ-Sp0                                                                                     | 148  | 36   | 78    | 86   | 91    | 19    | 234   | 94   | 246   | 82    | 279   | 189   | 523   | 211   | 640   | 91    |
| 155 | Galβ1-4Glcβ-Sp8                                                                                     | 173  | 88   | 105   | 9    | 261   | 91    | 232   | 143  | 369   | 131   | 521   | 116   | 1302  | 272   | 3395  | 1079  |
| 156 | GlcNAcα1-3Galβ1-4GlcNAcβ-Sp8                                                                        | 316  | 71   | 279   | 102  | 311   | 116   | 468   | 96   | 394   | 64    | 697   | 233   | 715   | 357   | 1240  | 600   |
| 157 | GlcNAcα1-6Galβ1-4GlcNAcβ-Sp8                                                                        | 378  | 32   | 279   | 30   | 426   | 144   | 326   | 47   | 424   | 106   | 617   | 160   | 550   | 316   | 602   | 186   |
| 158 | GlcNAcβ1-2Galβ1-3GalNAcα-Sp8                                                                        | 549  | 164  | 955   | 71   | 1149  | 304   | 1042  | 40   | 760   | 384   | 980   | 523   | 1166  | 334   | 2609  | 395   |

|     |                                                                                                     |      |      |      |     |      |      |      |      |      |      |      |      |       |      |       |       |
|-----|-----------------------------------------------------------------------------------------------------|------|------|------|-----|------|------|------|------|------|------|------|------|-------|------|-------|-------|
| 159 | GlcNAcβ1-3(GlcNAcβ1-6)GalNAcα-Sp8                                                                   | 41   | 11   | 78   | 12  | 71   | 48   | 119  | 88   | 105  | 41   | 207  | 20   | 150   | 35   | 809   | 343   |
| 160 | GlcNAcβ1-3(GlcNAcβ1-6)Galβ1-4GlcNAcβ-Sp8                                                            | 75   | 51   | 83   | 72  | 188  | 112  | 92   | 34   | 297  | 121  | 162  | 56   | 329   | 40   | 326   | 190   |
| 161 | GlcNAcβ1-3GalNAcα-Sp8                                                                               | 95   | 22   | 197  | 72  | 171  | 67   | 74   | 5    | 123  | 82   | 215  | 37   | 176   | 24   | 476   | 190   |
| 162 | GlcNAcβ1-3Galβ-Sp8                                                                                  | 148  | 101  | 75   | 21  | 225  | 126  | 94   | 16   | 282  | 34   | 322  | 83   | 244   | 95   | 740   | 281   |
| 163 | GlcNAcβ1-3Galβ1-3GalNAcα-Sp8                                                                        | 81   | 20   | 72   | 19  | 185  | 80   | 186  | 57   | 372  | 71   | 550  | 200  | 1358  | 342  | 3106  | 1367  |
| 164 | GlcNAcβ1-3Galβ1-4GlcNAcβ-Sp0                                                                        | 126  | 65   | 98   | 63  | 119  | 24   | 97   | 26   | 390  | 70   | 551  | 362  | 670   | 289  | 1425  | 547   |
| 165 | GlcNAcβ1-3Galβ1-4GlcNAcβ-Sp8                                                                        | 79   | 25   | 115  | 21  | 91   | 35   | 113  | 50   | 173  | 58   | 140  | 83   | 674   | 76   | 550   | 240   |
| 166 | GlcNAcβ1-3Galβ1-4GlcNAcβ1-3Galβ1-4GlcNAcβ-Sp0                                                       | 230  | 56   | 620  | 83  | 1401 | 124  | 2119 | 253  | 2981 | 436  | 8257 | 1592 | 40694 | 4990 | 43377 | 3392  |
| 167 | GlcNAcβ1-3Galβ1-4Glcβ-Sp0                                                                           | 179  | 54   | 171  | 56  | 292  | 26   | 281  | 100  | 478  | 119  | 551  | 238  | 1388  | 365  | 2547  | 645   |
| 168 | GlcNAcβ1-4MDPLys                                                                                    | 1818 | 52   | 1926 | 61  | 1999 | 232  | 1244 | 24   | 1810 | 208  | 2571 | 394  | 2173  | 70   | 3631  | 611   |
| 169 | GlcNAcβ1-4(GlcNAcβ1-6)GalNAcα-Sp8                                                                   | 306  | 81   | 249  | 27  | 397  | 124  | 255  | 71   | 421  | 108  | 538  | 87   | 627   | 77   | 915   | 130   |
| 170 | GlcNAcβ1-4Galβ1-4GlcNAcβ-Sp8                                                                        | 700  | 51   | 1049 | 28  | 1520 | 214  | 1075 | 63   | 1318 | 302  | 1646 | 403  | 1193  | 272  | 1550  | 138   |
| 171 | (GlcNAcβ1-4)6β-Sp8                                                                                  | 183  | 51   | 158  | 30  | 144  | 26   | 175  | 35   | 163  | 31   | 181  | 111  | 338   | 133  | 482   | 103   |
| 172 | (GlcNAcβ1-4)5β-Sp8                                                                                  | 280  | 241  | 244  | 107 | 230  | 60   | 131  | 63   | 230  | 50   | 215  | 58   | 446   | 67   | 459   | 213   |
| 173 | GlcNAcβ1-4GlcNAcβ1-4GlcNAcβ-Sp8                                                                     | 487  | 111  | 413  | 48  | 345  | 156  | 383  | 98   | 322  | 79   | 484  | 97   | 649   | 104  | 1483  | 271   |
| 174 | GlcNAcβ1-6(Galβ1-3)GalNAcα-Sp8                                                                      | 264  | 161  | 67   | 25  | 165  | 51   | 153  | 21   | 576  | 518  | 295  | 191  | 1002  | 341  | 1486  | 416   |
| 175 | GlcNAcβ1-6GalNAcα-Sp8                                                                               | 87   | 43   | 71   | 40  | 147  | 35   | 128  | 40   | 77   | 31   | 162  | 48   | 282   | 129  | 354   | 179   |
| 176 | GlcNAcβ1-6Galβ1-4GlcNAcβ-Sp8                                                                        | 216  | 190  | 63   | 13  | 137  | 42   | 97   | 24   | 220  | 73   | 336  | 120  | 246   | 62   | 345   | 182   |
| 177 | Glcα1-4Glcβ-Sp8                                                                                     | 149  | 23   | 125  | 20  | 91   | 56   | 228  | 56   | 317  | 16   | 376  | 41   | 561   | 233  | 755   | 95    |
| 178 | Glcα1-4Glcα-Sp8                                                                                     | 184  | 25   | 138  | 53  | 139  | 64   | 109  | 54   | 132  | 96   | 179  | 62   | 247   | 144  | 225   | 95    |
| 179 | Glcα1-6Glcα1-6Glcβ-Sp8                                                                              | 993  | 139  | 925  | 86  | 912  | 204  | 1063 | 62   | 930  | 62   | 1167 | 117  | 1031  | 152  | 1222  | 157   |
| 180 | Glcβ1-4Glcβ-Sp8                                                                                     | 2700 | 1341 | 5267 | 548 | 6338 | 606  | 2976 | 2276 | 3885 | 1550 | 5498 | 785  | 5511  | 503  | 5349  | 192   |
| 181 | Glcβ1-6Glcβ-Sp8                                                                                     | 2339 | 879  | 2101 | 255 | 1772 | 136  | 2544 | 216  | 803  | 557  | 2151 | 189  | 2341  | 242  | 4667  | 537   |
| 182 | G-ol-Sp8                                                                                            | 172  | 106  | 93   | 37  | 169  | 63   | 142  | 77   | 351  | 166  | 377  | 199  | 348   | 150  | 1691  | 303   |
| 183 | GlcAα-Sp8                                                                                           | 211  | 106  | 181  | 77  | 151  | 106  | 265  | 253  | 241  | 82   | 454  | 245  | 1114  | 183  | 2425  | 563   |
| 184 | GlcAβ-Sp8                                                                                           | 135  | 69   | 237  | 121 | 287  | 202  | 376  | 179  | 648  | 371  | 631  | 47   | 712   | 231  | 2471  | 1222  |
| 185 | GlcAβ1-3Galβ-Sp8                                                                                    | 175  | 62   | 321  | 163 | 250  | 52   | 147  | 66   | 163  | 78   | 493  | 166  | 301   | 131  | 508   | 389   |
| 186 | GlcAβ1-6Galβ-Sp8                                                                                    | 469  | 114  | 454  | 75  | 742  | 244  | 398  | 135  | 519  | 267  | 486  | 299  | 753   | 420  | 1268  | 483   |
| 187 | KDNα2-3Galβ1-3GlcNAcβ-Sp0                                                                           | 182  | 40   | 701  | 109 | 1724 | 653  | 2366 | 506  | 5963 | 2240 | 5978 | 2578 | 14257 | 3510 | 44417 | 12734 |
| 188 | KDNα2-3Galβ1-4GlcNAcβ-Sp0                                                                           | 507  | 352  | 160  | 44  | 273  | 79   | 251  | 93   | 1074 | 240  | 935  | 234  | 2576  | 648  | 11962 | 2381  |
| 189 | Mana1-2Mana1-2Mana1-3Mana-Sp9                                                                       | 154  | 33   | 194  | 62  | 237  | 57   | 274  | 39   | 299  | 31   | 273  | 114  | 226   | 61   | 452   | 114   |
| 190 | Mana1-2Mana1-3(Mana1-2Mana1-6)Mana-Sp9                                                              | 298  | 13   | 206  | 64  | 242  | 102  | 137  | 51   | 155  | 96   | 233  | 128  | 273   | 115  | 456   | 140   |
| 191 | Mana1-2Mana1-3Mana-Sp9                                                                              | 202  | 77   | 196  | 124 | 147  | 33   | 153  | 74   | 218  | 69   | 356  | 127  | 489   | 173  | 632   | 128   |
| 192 | Mana1-6(Mana1-2Mana1-3)Mana1-6(Mana2Mana1-3)Manβ1-4GlcNAcβ1-4GlcNAcβ-Sp12                           | 191  | 96   | 141  | 53  | 214  | 35   | 204  | 85   | 793  | 354  | 670  | 235  | 821   | 200  | 1740  | 1190  |
| 193 | Mana1-2Mana1-6(Mana1-3)Mana1-6(Mana2Mana2Mana1-3)Manβ1-4GlcNAcβ1-4GlcNAcβ-Sp12                      | 1479 | 921  | 160  | 73  | 184  | 31   | 221  | 209  | 248  | 160  | 193  | 41   | 387   | 114  | 702   | 234   |
| 194 | Mana1-2Mana1-2Mana1-3(Mana1-2Mana1-3(Mana1-2Mana1-6)Mana1-6)Manβ1-4GlcNAcβ1-4GlcNAcβ-Sp12           | 102  | 20   | 114  | 43  | 286  | 163  | 211  | 33   | 267  | 80   | 314  | 197  | 519   | 212  | 1200  | 528   |
| 195 | Mana1-3(Mana1-6)Mana-Sp9                                                                            | 307  | 197  | 92   | 20  | 177  | 52   | 110  | 51   | 159  | 55   | 299  | 108  | 212   | 52   | 693   | 521   |
| 196 | Mana1-3(Mana1-2Mana1-2Mana1-6)Mana-Sp9                                                              | 142  | 17   | 147  | 46  | 238  | 71   | 187  | 47   | 349  | 143  | 410  | 181  | 439   | 119  | 555   | 241   |
| 197 | Mana1-6(Mana1-3)Mana1-6(Mana2Mana1-3)Manβ1-4GlcNAcβ1-4GlcNAcβ-Sp12                                  | 104  | 19   | 214  | 100 | 229  | 73   | 115  | 91   | 171  | 94   | 353  | 198  | 221   | 106  | 550   | 391   |
| 198 | Mana1-6(Mana1-3)Mana1-6(Mana1-3)Manβ1-4GlcNAcβ1-4GlcNAcβ-Sp12                                       | 72   | 19   | 125  | 35  | 725  | 624  | 72   | 25   | 580  | 464  | 146  | 38   | 442   | 82   | 292   | 119   |
| 199 | Neu5Aca2-6Galβ1-4GlcNAcβ1-2Mana1-3(Neu5Aca2-3Galβ1-4GlcNAcβ1-2Mana1-6)Manβ1-4GlcNAcβ1-4GlcNAcβ-Sp12 | 576  | 441  | 191  | 94  | 404  | 160  | 206  | 60   | 386  | 100  | 265  | 21   | 651   | 147  | 3356  | 983   |
| 200 | Manβ1-4GlcNAcβ-Sp0                                                                                  | 188  | 73   | 134  | 15  | 110  | 63   | 93   | 20   | 224  | 109  | 458  | 96   | 378   | 121  | 372   | 90    |
| 201 | Fuca1-3(Galβ1-4)GlcNAcβ1-2Mana1-3(Fuca1-3(Galβ1-4)GlcNAcβ1-2Mana1-6)Manβ1-4GlcNAcβ1-4GlcNAcβ-Sp20   | 103  | 49   | 59   | 14  | 172  | 93   | 119  | 81   | 275  | 101  | 121  | 48   | 179   | 37   | 1038  | 275   |
| 202 | Neu5Aca2-3Galβ1-3GalNAcα-Sp8                                                                        | 243  | 117  | 596  | 59  | 2303 | 573  | 2244 | 180  | 6722 | 216  | 8226 | 3039 | 42462 | 5863 | 43932 | 8377  |
| 203 | NeuAca2-8NeuAca2-8NeuAca2-8NeuAca2-3(GalNAcβ1-4)Galβ1-4Glcβ-Sp0                                     | 2205 | 1907 | 500  | 410 | 93   | 37   | 347  | 271  | 197  | 84   | 133  | 35   | 288   | 146  | 682   | 165   |
| 204 | Neu5Aca2-8Neu5Aca2-8Neu5Aca2-3(GalNAcβ1-4)Galβ1-4Glcβ-Sp0                                           | 89   | 12   | 153  | 43  | 161  | 91   | 93   | 34   | 211  | 50   | 199  | 42   | 413   | 245  | 858   | 377   |
| 205 | Neu5Aca2-8Neu5Aca2-8Neu5Aca2-3Galβ1-4Glcβ-Sp0                                                       | 382  | 252  | 435  | 37  | 2376 | 270  | 1576 | 76   | 3030 | 737  | 2727 | 842  | 7792  | 2192 | 42666 | 2912  |
| 206 | Neu5Aca2-8Neu5Aca2-3(GalNAcβ1-4)Galβ1-4Glcβ-Sp0                                                     | 92   | 52   | 116  | 21  | 320  | 212  | 168  | 40   | 137  | 109  | 107  | 56   | 325   | 210  | 1216  | 1281  |
| 207 | Neu5Aca2-8Neu5Aca2-8Neu5Aca-Sp8                                                                     | 132  | 39   | 104  | 63  | 96   | 124  | 98   | 38   | 223  | 44   | 301  | 138  | 405   | 286  | 957   | 836   |
| 208 | Neu5Aca2-3(6-O-Su)Galβ1-4(Fuca1-3)GlcNAcβ-Sp8                                                       | 101  | 30   | 90   | 55  | 760  | 698  | 163  | 55   | 554  | 690  | 160  | 35   | 285   | 61   | 227   | 128   |
| 209 | Neu5Aca2-3(GalNAcβ1-4)Galβ1-4GlcNAcβ-Sp0                                                            | 136  | 81   | 125  | 30  | 147  | 28   | 175  | 100  | 210  | 70   | 317  | 103  | 225   | 37   | 453   | 130   |
| 210 | Neu5Aca2-3(GalNAcβ1-4)Galβ1-4GlcNAcβ-Sp8                                                            | 287  | 56   | 91   | 44  | 1182 | 1646 | 89   | 45   | 211  | 173  | 218  | 57   | 357   | 101  | 285   | 18    |
| 211 | Neu5Aca2-3(GalNAcβ1-4)Galβ1-4Glcβ-Sp0                                                               | 105  | 63   | 93   | 24  | 149  | 110  | 171  | 84   | 165  | 56   | 169  | 42   | 408   | 160  | 1329  | 531   |

|     |                                                                                           |      |      |      |      |       |      |       |      |       |       |       |       |       |       |       |       |
|-----|-------------------------------------------------------------------------------------------|------|------|------|------|-------|------|-------|------|-------|-------|-------|-------|-------|-------|-------|-------|
| 212 | Neu5Aca2-3(Neu5Aca2-3Galβ1-3GalNAcβ1-4)Galβ1-4Glcβ-Sp0                                    | 1020 | 241  | 1252 | 157  | 3824  | 967  | 4921  | 816  | 16820 | 1951  | 13217 | 6699  | 49503 | 9476  | 40068 | 2247  |
| 213 | Neu5Aca2-3(Neu5Aca2-6)GalNAcα-Sp8                                                         | 77   | 9    | 95   | 11   | 165   | 41   | 155   | 102  | 114   | 71    | 229   | 74    | 382   | 185   | 648   | 499   |
| 214 | Neu5Aca2-3GalNAcα-Sp8                                                                     | 181  | 75   | 130  | 55   | 330   | 117  | 104   | 48   | 402   | 326   | 339   | 131   | 981   | 120   | 1441  | 224   |
| 215 | Neu5Aca2-3GalNAcβ1-4GlcNAcβ-Sp0                                                           | 999  | 936  | 340  | 377  | 336   | 75   | 204   | 35   | 199   | 82    | 187   | 87    | 455   | 88    | 2121  | 276   |
| 216 | Neu5Aca2-3Galβ1-3(6OSO3)GlcNAc-Sp8                                                        | 1007 | 326  | 3379 | 1254 | 3810  | 4291 | 11290 | 2117 | 14176 | 16693 | 13349 | 12674 | 22784 | 16557 | 22590 | 22561 |
| 217 | Neu5Aca2-3Galβ1-3(Fuca1-4)GlcNAcβ-Sp8                                                     | 272  | 131  | 104  | 87   | 128   | 42   | 130   | 78   | 195   | 92    | 184   | 51    | 157   | 31    | 1006  | 405   |
| 218 | Neu5Aca2-3Galβ1-3(Fuca1-4)GlcNAcβ1-3Galβ1-4(Fuca1-3)GlcNAcβ-Sp0                           | 572  | 91   | 576  | 35   | 761   | 142  | 676   | 65   | 698   | 80    | 706   | 68    | 809   | 40    | 3968  | 446   |
| 219 | Neu5Aca2-3Galβ1-3(Neu5Aca2-3Galβ1-4)GlcNAcβ-Sp8                                           | 87   | 32   | 141  | 62   | 124   | 50   | 133   | 17   | 104   | 47    | 126   | 83    | 337   | 169   | 1696  | 304   |
| 220 | Neu5Aca2-3Galβ1-3(6OSO3)GalNAcα-Sp8                                                       | 172  | 14   | 744  | 32   | 2301  | 689  | 2094  | 149  | 9948  | 6768  | 5967  | 3525  | 26685 | 22019 | 44361 | 11498 |
| 221 | Neu5Aca2-3Galβ1-3(Neu5Aca2-6)GalNAcα-Sp8                                                  | 113  | 54   | 154  | 25   | 316   | 190  | 431   | 243  | 899   | 219   | 510   | 96    | 1744  | 364   | 17137 | 4944  |
| 222 | Neu5Aca2-3Galβ-Sp8                                                                        | 210  | 132  | 162  | 24   | 825   | 940  | 84    | 41   | 250   | 191   | 195   | 106   | 306   | 249   | 579   | 308   |
| 223 | Neu5Aca2-3Galβ1-3GalNAcβ1-3Gala1-4Galβ1-4Glcβ-Sp0                                         | 655  | 79   | 1220 | 155  | 2304  | 1455 | 5398  | 502  | 6928  | 1694  | 8752  | 5057  | 34152 | 13183 | 39230 | 15070 |
| 224 | Neu5Aca2-3Galβ1-3GlcNAcβ1-3Galβ1-4GlcNAcβ-Sp0                                             | 856  | 182  | 2485 | 145  | 10422 | 3876 | 10323 | 740  | 33304 | 12359 | 27353 | 11284 | 37432 | 6248  | 40089 | 5710  |
| 225 | Neu5Aca2-3Galβ1-3GlcNAcβ-Sp0                                                              | 220  | 83   | 630  | 114  | 1851  | 923  | 2180  | 278  | 4839  | 1834  | 8804  | 2778  | 43379 | 12842 | 43444 | 13249 |
| 226 | Neu5Aca2-3Galβ1-3GlcNAcβ-Sp8                                                              | 305  | 128  | 465  | 92   | 1395  | 532  | 2302  | 91   | 2874  | 488   | 8689  | 1087  | 30527 | 3727  | 32893 | 6444  |
| 227 | Neu5Aca2-3Galβ1-4(6OSO3)GlcNAcβ-Sp8                                                       | 331  | 135  | 1206 | 80   | 2250  | 495  | 3855  | 517  | 5112  | 487   | 15696 | 5113  | 38827 | 6131  | 43229 | 1182  |
| 228 | Neu5Aca2-3Galβ1-4(Fuca1-3)(6OSO3)GlcNAcβ-Sp8                                              | 128  | 56   | 123  | 55   | 138   | 30   | 261   | 115  | 423   | 167   | 436   | 171   | 801   | 386   | 1589  | 1651  |
| 229 | Neu5Aca2-3Galβ1-4(Fuca1-3)GlcNAcβ1-3Galβ1-4(Fuca1-3)GlcNAcβ1-3Galβ1-4(Fuca1-3)GlcNAcβ-Sp0 | 116  | 13   | 123  | 12   | 197   | 53   | 141   | 32   | 373   | 85    | 335   | 75    | 611   | 230   | 818   | 83    |
| 230 | Neu5Aca2-3Galβ1-4(Fuca1-3)GlcNAcβ-Sp0                                                     | 1535 | 1902 | 329  | 156  | 151   | 77   | 300   | 262  | 150   | 50    | 168   | 53    | 449   | 88    | 2544  | 527   |
| 231 | Neu5Aca2-3Galβ1-4(Fuca1-3)GlcNAcβ-Sp8                                                     | 120  | 46   | 58   | 13   | 91    | 40   | 55    | 15   | 122   | 33    | 222   | 68    | 127   | 46    | 414   | 214   |
| 232 | Neu5Aca2-3Galβ1-4(Fuca1-3)GlcNAcβ1-3Galβ-Sp8                                              | 254  | 185  | 104  | 23   | 41    | 14   | 115   | 67   | 203   | 91    | 321   | 144   | 153   | 74    | 768   | 231   |
| 233 | Neu5Aca2-3Galβ1-4(Fuca1-3)GlcNAcβ1-3Galβ1-4GlcNAcβ-Sp8                                    | 177  | 18   | 128  | 21   | 389   | 152  | 218   | 60   | 375   | 49    | 243   | 69    | 319   | 99    | 1340  | 293   |
| 234 | Neu5Aca2-3Galβ1-4GlcNAcβ1-3Galβ1-4(Fuca1-3)GlcNAc-Sp0                                     | 158  | 37   | 388  | 100  | 776   | 43   | 1304  | 168  | 3459  | 1021  | 2520  | 681   | 5923  | 2062  | 43541 | 4171  |
| 235 | Neu5Aca2-3Galβ1-4GlcNAcβ1-3Galβ1-4GlcNAcβ1-3Galβ1-4GlcNAcβ-Sp0                            | 754  | 115  | 2980 | 116  | 12889 | 3685 | 11202 | 1038 | 40552 | 3150  | 28611 | 9557  | 49274 | 4644  | 47391 | 2857  |
| 236 | Neu5Aca2-3Galβ1-4GlcNAcβ-Sp0                                                              | 100  | 40   | 167  | 35   | 241   | 81   | 444   | 44   | 825   | 124   | 984   | 387   | 1782  | 202   | 14728 | 982   |
| 237 | Neu5Aca2-3Galβ1-4GlcNAcβ-Sp8                                                              | 308  | 186  | 172  | 46   | 650   | 242  | 339   | 87   | 1141  | 239   | 1467  | 343   | 2439  | 258   | 17163 | 3818  |
| 238 | Neu5Aca2-3Galβ1-4GlcNAcβ1-3Galβ1-4GlcNAcβ-Sp0                                             | 135  | 44   | 186  | 26   | 225   | 108  | 512   | 165  | 587   | 144   | 1421  | 466   | 5295  | 448   | 6344  | 2024  |
| 239 | Neu5Aca2-3Galβ1-4Glcβ-Sp0                                                                 | 326  | 95   | 847  | 115  | 1086  | 219  | 4095  | 325  | 2934  | 611   | 9700  | 3027  | 27499 | 9037  | 35383 | 1780  |
| 240 | Neu5Aca2-3Galβ1-4Glcβ-Sp8                                                                 | 1832 | 141  | 2949 | 287  | 5140  | 1322 | 5170  | 465  | 4651  | 590   | 12320 | 4529  | 38993 | 9422  | 41996 | 5979  |
| 241 | Galβ1-4GlcNAcβ1-2Mana1-3(Fuca1-3)(Galβ1-4)GlcNAcβ1-2Mana1-6)Manβ1-4GlcNAcβ1-4GlcNAcβ-Sp20 | 75   | 61   | 107  | 56   | 113   | 69   | 72    | 24   | 153   | 50    | 183   | 69    | 99    | 37    | 872   | 447   |
| 242 | Neu5Aca2-6GalNAcα-Sp8                                                                     | 2042 | 1761 | 163  | 78   | 87    | 16   | 352   | 388  | 124   | 45    | 158   | 94    | 185   | 78    | 621   | 251   |
| 243 | Neu5Aca2-6GalNAcβ1-4GlcNAcβ-Sp0                                                           | 245  | 84   | 59   | 24   | 118   | 88   | 60    | 13   | 138   | 62    | 171   | 73    | 150   | 76    | 293   | 129   |
| 244 | Neu5Aca2-6Galβ1-4(6OSO3)GlcNAcβ-Sp8                                                       | 312  | 228  | 237  | 144  | 346   | 94   | 163   | 48   | 292   | 124   | 278   | 164   | 324   | 104   | 875   | 189   |
| 245 | Neu5Aca2-6Galβ1-4GlcNAcβ-Sp0                                                              | 116  | 30   | 119  | 39   | 215   | 74   | 96    | 8    | 188   | 55    | 445   | 234   | 1152  | 677   | 3191  | 1700  |
| 246 | Neu5Aca2-6Galβ1-4GlcNAcβ-Sp8                                                              | 166  | 78   | 252  | 55   | 136   | 137  | 112   | 30   | 128   | 36    | 284   | 41    | 246   | 35    | 619   | 270   |
| 247 | Neu5Aca2-6Galβ1-4GlcNAcβ1-3Galβ1-4(Fuca1-3)GlcNAcβ1-3Galβ1-4(Fuca1-3)GlcNAcβ-Sp0          | 102  | 73   | 116  | 19   | 873   | 408  | 280   | 81   | 249   | 70    | 213   | 61    | 502   | 257   | 1071  | 328   |
| 248 | Neu5Aca2-6Galβ1-4GlcNAcβ1-3Galβ1-4GlcNAcβ-Sp0                                             | 182  | 44   | 553  | 97   | 1887  | 461  | 1943  | 257  | 5637  | 1483  | 6161  | 2568  | 12442 | 1297  | 54832 | 5608  |
| 249 | Neu5Aca2-6Galβ1-4Glcβ-Sp0                                                                 | 276  | 50   | 690  | 38   | 2072  | 386  | 1524  | 199  | 8167  | 2760  | 4812  | 871   | 26783 | 4537  | 53285 | 1230  |
| 250 | Neu5Aca2-6Galβ1-4Glcβ-Sp8                                                                 | 105  | 64   | 93   | 30   | 71    | 57   | 182   | 88   | 561   | 437   | 196   | 80    | 587   | 407   | 1177  | 1086  |
| 251 | Neu5Aca2-6Galβ-Sp8                                                                        | 178  | 61   | 151  | 41   | 94    | 21   | 193   | 25   | 163   | 49    | 361   | 137   | 461   | 249   | 569   | 409   |
| 252 | Neu5Aca2-8Neu5Aca-Sp8                                                                     | 166  | 29   | 100  | 34   | 73    | 28   | 201   | 108  | 145   | 48    | 201   | 53    | 282   | 171   | 611   | 382   |
| 253 | Neu5Aca2-8Neu5Aca2-3Galβ1-4Glcβ-Sp0                                                       | 604  | 155  | 2339 | 177  | 8832  | 3526 | 9374  | 1614 | 13871 | 8387  | 41932 | 15376 | 40265 | 5447  | 42387 | 1784  |
| 254 | Neu5Aca2-6GalNAcα-Sp8                                                                     | 98   | 58   | 91   | 30   | 128   | 80   | 202   | 73   | 131   | 65    | 164   | 59    | 224   | 75    | 470   | 194   |
| 255 | Neu5Aca2-6Galβ1-4GlcNAcβ-Sp8                                                              | 304  | 157  | 73   | 12   | 118   | 62   | 155   | 70   | 115   | 21    | 231   | 86    | 187   | 49    | 1392  | 1719  |
| 256 | Galβ1-4GlcNAcβ1-2Mana1-3(Neu5Aca2-6Galβ1-4GlcNAcβ1-2Mana1-6)Manβ1-4GlcNAcβ1-4GlcNAcβ-Sp21 | 77   | 18   | 77   | 21   | 478   | 335  | 119   | 75   | 191   | 48    | 216   | 91    | 159   | 34    | 271   | 39    |
| 257 | Neu5Gca2-3Galβ1-3(Fuca1-4)GlcNAcβ-Sp0                                                     | 149  | 46   | 175  | 52   | 464   | 304  | 164   | 25   | 290   | 77    | 299   | 76    | 451   | 101   | 5080  | 2305  |
| 258 | Neu5Gca2-3Galβ1-3GlcNAcβ-Sp0                                                              | 260  | 74   | 561  | 125  | 1921  | 374  | 2313  | 552  | 8376  | 4042  | 10813 | 5157  | 16359 | 5170  | 47997 | 9751  |
| 259 | Neu5Gca2-3Galβ1-4(Fuca1-3)GlcNAcβ-Sp0                                                     | 102  | 31   | 98   | 53   | 787   | 809  | 173   | 77   | 288   | 56    | 286   | 170   | 512   | 214   | 1640  | 457   |
| 260 | Neu5Gca2-3Galβ1-4GlcNAcβ-Sp0                                                              | 126  | 56   | 127  | 70   | 285   | 79   | 316   | 90   | 781   | 346   | 710   | 96    | 1456  | 166   | 12400 | 1631  |
| 261 | Neu5Gca2-3Galβ1-4Glcβ-Sp0                                                                 | 349  | 327  | 937  | 104  | 3128  | 1775 | 2513  | 228  | 6697  | 2137  | 5909  | 2048  | 19128 | 7330  | 59440 | 4642  |
| 262 | Neu5Gca2-6GalNAcα-Sp0                                                                     | 110  | 29   | 133  | 91   | 120   | 34   | 226   | 38   | 295   | 121   | 285   | 144   | 133   | 32    | 314   | 127   |
| 263 | Neu5Gca2-6Galβ1-4GlcNAcβ-Sp0                                                              | 142  | 109  | 60   | 32   | 118   | 80   | 114   | 24   | 128   | 65    | 182   | 104   | 165   | 67    | 900   | 236   |
| 264 | Neu5Gca-Sp8                                                                               | 91   | 34   | 155  | 82   | 167   | 86   | 180   | 100  | 261   | 138   | 188   | 127   | 186   | 120   | 707   | 232   |

|     |                                                                                           |      |      |       |     |       |      |       |      |       |      |       |      |       |       |       |       |
|-----|-------------------------------------------------------------------------------------------|------|------|-------|-----|-------|------|-------|------|-------|------|-------|------|-------|-------|-------|-------|
| 265 | [3OSO3]Galβ1-4(Fuca1-3)(6OSO3)Glc-Sp0                                                     | 295  | 29   | 299   | 64  | 329   | 51   | 436   | 155  | 1250  | 697  | 844   | 131  | 3220  | 738   | 7021  | 4215  |
| 266 | [3OSO3]Galβ1-4(Fuca1-3)Glc-Sp0                                                            | 106  | 13   | 120   | 12  | 265   | 74   | 198   | 51   | 218   | 144  | 650   | 150  | 427   | 79    | 889   | 341   |
| 267 | [3OSO3]Galβ1-4[Fuca1-3][6OSO3]GlcNAc-Sp8                                                  | 335  | 190  | 282   | 91  | 595   | 251  | 540   | 116  | 916   | 410  | 760   | 288  | 2180  | 638   | 9650  | 4906  |
| 268 | [3OSO3]Galβ1-4[Fuca1-3]GlcNAc-Sp0                                                         | 229  | 98   | 128   | 32  | 96    | 112  | 151   | 45   | 237   | 94   | 263   | 52   | 432   | 302   | 309   | 146   |
| 269 | Fuca1-2[6OSO3]Galβ1-4GlcNAc-Sp0                                                           | 132  | 26   | 124   | 36  | 148   | 69   | 187   | 49   | 170   | 30   | 243   | 182  | 275   | 152   | 294   | 69    |
| 270 | Fuca1-2Galβ1-4[6OSO3]GlcNAc-Sp8                                                           | 288  | 90   | 207   | 71  | 588   | 338  | 572   | 162  | 926   | 355  | 874   | 172  | 5065  | 2046  | 7253  | 1559  |
| 271 | Fuca1-2[6OSO3]Galβ1-4[6OSO3]Glc-Sp0                                                       | 204  | 56   | 235   | 84  | 291   | 128  | 261   | 52   | 579   | 84   | 402   | 66   | 811   | 215   | 1355  | 198   |
| 272 | Fuca1-2-(6OSO3)-Galβ1-4Glc-Sp0                                                            | 199  | 88   | 262   | 34  | 346   | 69   | 236   | 19   | 254   | 125  | 322   | 192  | 448   | 246   | 815   | 318   |
| 273 | Fuca1-2-Galβ1-4[6OSO3]Glc-Sp0                                                             | 265  | 81   | 841   | 147 | 1871  | 1035 | 2441  | 378  | 2145  | 839  | 5283  | 675  | 20879 | 11147 | 26190 | 4452  |
| 274 | Galβ1-3(Fuca1-4)GlcNAcβ1-3Galβ1-3(Fuca1-4)GlcNAcβ-Sp0                                     | 2195 | 1595 | 144   | 10  | 280   | 45   | 130   | 54   | 251   | 75   | 259   | 120  | 163   | 23    | 474   | 116   |
| 275 | Galβ1-3-(Galβ1-4GlcNAcβ1-6)GalNAc-Sp14                                                    | 179  | 68   | 205   | 68  | 172   | 86   | 245   | 69   | 129   | 110  | 250   | 66   | 557   | 87    | 635   | 263   |
| 276 | Galβ1-3(GlcNAcβ1-6)GalNAc-Sp14                                                            | 238  | 379  | 163   | 49  | 258   | 178  | 145   | 72   | 373   | 161  | 222   | 68   | 568   | 326   | 1794  | 541   |
| 277 | Galβ1-3-(Neu5Aa2-3Galβ1-4GlcNAcβ1-6)GalNAc-Sp14                                           | 193  | 128  | 233   | 54  | 514   | 265  | 614   | 74   | 1641  | 734  | 737   | 170  | 1690  | 259   | 20603 | 7089  |
| 278 | Galβ1-3GalNAc-Sp14                                                                        | 210  | 165  | 174   | 65  | 193   | 35   | 117   | 59   | 136   | 55   | 236   | 80   | 234   | 14    | 1328  | 92    |
| 279 | Galβ1-3GlcNAcβ1-3Galβ1-3GlcNAcβ-Sp0                                                       | 86   | 64   | 195   | 57  | 113   | 22   | 226   | 110  | 492   | 30   | 184   | 33   | 705   | 95    | 9891  | 3241  |
| 280 | Galβ1-4[Fuca1-3][6OSO3]GlcNAc-Sp0                                                         | 86   | 15   | 172   | 81  | 166   | 51   | 319   | 153  | 244   | 87   | 387   | 160  | 252   | 73    | 663   | 357   |
| 281 | Galβ1-4[Fuca1-3][6OSO3]Glc-Sp0                                                            | 122  | 27   | 152   | 112 | 656   | 344  | 144   | 72   | 242   | 30   | 345   | 113  | 363   | 130   | 729   | 100   |
| 282 | Galβ1-4(Fuca1-3)GlcNAcβ1-3Galβ1-3(Fuca1-4)GlcNAcβ-Sp0                                     | 118  | 15   | 111   | 41  | 214   | 49   | 161   | 38   | 168   | 17   | 223   | 104  | 341   | 151   | 586   | 173   |
| 283 | Galβ1-4GlcNAcβ1-3Galβ1-3GlcNAcβ-Sp0                                                       | 456  | 142  | 2957  | 355 | 7178  | 3167 | 9780  | 302  | 23304 | 9296 | 18020 | 4385 | 37164 | 4412  | 43220 | 2722  |
| 284 | Neu5Aca2-3Galβ1-3GlcNAcβ1-3Galβ1-3GlcNAcβ-Sp0                                             | 972  | 79   | 2917  | 377 | 13583 | 1265 | 15424 | 1587 | 42202 | 4455 | 41343 | 2049 | 45073 | 2117  | 46369 | 3025  |
| 285 | Neu5Aca2-3Galβ1-4GlcNAcβ1-3Galβ1-3GlcNAcβ-Sp0                                             | 250  | 152  | 139   | 54  | 517   | 275  | 487   | 81   | 1020  | 252  | 886   | 280  | 5870  | 897   | 10227 | 2094  |
| 286 | [3OSO3]Galβ1-4[6OSO3]GlcNAcβ-Sp0                                                          | 634  | 177  | 2231  | 394 | 6254  | 924  | 9619  | 2213 | 12764 | 3052 | 32428 | 4465 | 48808 | 9487  | 46394 | 8328  |
| 287 | [3OSO3][4OSO3]Galβ1-4GlcNAcβ-SpSp0                                                        | 7994 | 628  | 10291 | 539 | 12439 | 3328 | 9074  | 503  | 11824 | 1624 | 10552 | 750  | 9513  | 1840  | 10635 | 1956  |
| 288 | [6OSO3]Galβ1-4[6OSO3]GlcNAcβ-Sp0                                                          | 266  | 71   | 149   | 65  | 173   | 116  | 317   | 105  | 424   | 340  | 452   | 129  | 1007  | 186   | 1927  | 355   |
| 289 | 6-H2PO3Glcβ-Sp10                                                                          | 370  | 161  | 697   | 56  | 254   | 136  | 674   | 114  | 578   | 286  | 782   | 431  | 1015  | 432   | 1019  | 517   |
| 290 | Galα1-3(Fuca1-2)Galβ-Sp18                                                                 | 211  | 52   | 229   | 52  | 143   | 50   | 195   | 48   | 260   | 65   | 339   | 77   | 244   | 14    | 356   | 56    |
| 291 | Galα1-3GalNAc-Sp16                                                                        | 128  | 143  | 85    | 24  | 63    | 37   | 116   | 46   | 122   | 100  | 141   | 74   | 194   | 41    | 166   | 81    |
| 292 | Galβ1-3GalNAc-Sp16                                                                        | 1039 | 1260 | 126   | 76  | 196   | 83   | 277   | 195  | 278   | 117  | 353   | 167  | 521   | 161   | 1180  | 439   |
| 293 | Galβ1-3(Neu5Aca2-3Galβ1-4(Fuca1-3)GlcNAcβ1-6)GalNAc-Sp14                                  | 183  | 91   | 121   | 18  | 228   | 35   | 190   | 42   | 233   | 38   | 347   | 57   | 221   | 31    | 1009  | 110   |
| 294 | Galβ1-3Galβ1-4GlcNAcβ-Sp8                                                                 | 225  | 158  | 142   | 75  | 1111  | 282  | 291   | 81   | 780   | 102  | 609   | 110  | 1828  | 619   | 16356 | 4438  |
| 295 | Galβ1-4GlcNAcβ1-2Manα1-3(Neu5Aca2-6Galβ1-4GlcNAcβ1-2Manα1-6)Manβ1-4GlcNAcβ1-4GlcNAcβ-Sp12 | 127  | 45   | 145   | 23  | 609   | 595  | 150   | 69   | 359   | 59   | 236   | 22   | 372   | 70    | 2453  | 685   |
| 296 | Galβ1-4GlcNAcβ1-3(Galβ1-4GlcNAcβ1-6)Galβ1-4GlcNAc-Sp0                                     | 110  | 42   | 92    | 18  | 101   | 23   | 79    | 18   | 272   | 121  | 278   | 110  | 354   | 102   | 1575  | 564   |
| 297 | Galβ1-4GlcNAcβ1-3(GlcNAcβ1-6)Galβ1-4GlcNAc-Sp0                                            | 603  | 553  | 105   | 88  | 91    | 21   | 123   | 24   | 249   | 180  | 184   | 100  | 426   | 146   | 1313  | 439   |
| 298 | Galβ1-4GlcNAcα1-6Galβ1-4GlcNAcβ-Sp0                                                       | 112  | 53   | 203   | 68  | 137   | 41   | 125   | 11   | 136   | 48   | 185   | 20   | 375   | 43    | 493   | 247   |
| 299 | Galβ1-4GlcNAcβ1-6Galβ1-4GlcNAcβ-Sp0                                                       | 311  | 257  | 95    | 56  | 177   | 89   | 109   | 25   | 398   | 314  | 245   | 135  | 258   | 180   | 568   | 300   |
| 300 | GalNAc-Sp15                                                                               | 82   | 13   | 151   | 93  | 216   | 65   | 276   | 158  | 246   | 93   | 236   | 38   | 296   | 130   | 787   | 449   |
| 301 | GalNAcα1-3(Fuca1-2)Galβ-Sp18                                                              | 132  | 57   | 190   | 51  | 230   | 123  | 174   | 67   | 409   | 25   | 346   | 105  | 285   | 161   | 530   | 142   |
| 302 | GalNAcβ1-3Galβ-Sp8                                                                        | 77   | 16   | 149   | 39  | 420   | 187  | 377   | 81   | 559   | 335  | 1585  | 806  | 3540  | 1513  | 3975  | 2148  |
| 303 | GlcAβ1-3GlcNAcβ-Sp8                                                                       | 5216 | 248  | 5952  | 204 | 5335  | 417  | 4785  | 321  | 4474  | 1438 | 7164  | 1498 | 5836  | 873   | 7391  | 614   |
| 304 | GlcNAcβ1-2Manα1-3(Neu5Aca2-6Galβ1-4GlcNAcβ1-2Manα1-6)Manβ1-4GlcNAcβ1-4GlcNAcβ-Sp12        | 2663 | 2397 | 251   | 113 | 211   | 61   | 222   | 159  | 138   | 19   | 154   | 46   | 555   | 46    | 468   | 169   |
| 305 | GlcNAcβ1-2Manα1-3(GlcNAcβ1-2Manα1-6)Manβ1-4GlcNAcβ1-4GlcNAcβ-Sp12                         | 108  | 41   | 52    | 44  | 209   | 137  | 100   | 62   | 98    | 9    | 199   | 111  | 182   | 31    | 398   | 146   |
| 306 | GlcNAcβ1-3Man-Sp10                                                                        | 166  | 70   | 138   | 57  | 266   | 110  | 316   | 131  | 647   | 68   | 681   | 132  | 1636  | 662   | 2027  | 923   |
| 307 | GlcNAcβ1-4GlcNAcβ-Sp10                                                                    | 129  | 69   | 155   | 53  | 715   | 648  | 218   | 71   | 1202  | 987  | 631   | 256  | 2061  | 2968  | 1997  | 1042  |
| 308 | GlcNAcβ1-4GlcNAcβ-Sp12                                                                    | 167  | 30   | 114   | 28  | 233   | 40   | 195   | 109  | 223   | 42   | 298   | 139  | 539   | 196   | 577   | 236   |
| 309 | HOOC(CH3)CH-3-O-GlcNAcβ1-4GlcNAcβ-Sp10                                                    | 733  | 414  | 604   | 16  | 715   | 118  | 395   | 89   | 784   | 111  | 745   | 105  | 688   | 134   | 809   | 328   |
| 310 | Manα1-3(Manα1-6)Manβ1-4GlcNAcβ1-4GlcNAcβ-Sp12                                             | 115  | 35   | 109   | 53  | 91    | 34   | 157   | 39   | 134   | 50   | 113   | 45   | 220   | 126   | 224   | 81    |
| 311 | Manα1-6Manβ-Sp10                                                                          | 56   | 18   | 114   | 58  | 171   | 78   | 125   | 62   | 269   | 294  | 205   | 110  | 259   | 101   | 672   | 530   |
| 312 | Manα1-6(Manα1-3)Manα1-6(Manα1-3)Manβ-Sp10                                                 | 143  | 30   | 91    | 24  | 58    | 21   | 103   | 41   | 111   | 49   | 240   | 63   | 227   | 121   | 239   | 198   |
| 313 | Manα1-2Manα1-2Manα1-3(Manα1-2Manα1-6(Manα1-3)Manα1-6)Manα-Sp9                             | 281  | 102  | 105   | 30  | 221   | 95   | 124   | 32   | 243   | 105  | 207   | 56   | 281   | 25    | 248   | 139   |
| 314 | Manα1-2Manα1-2Manα1-3(Manα1-2Manα1-6(Manα1-2Manα1-3)Manα1-6)Manα-Sp9                      | 146  | 78   | 178   | 51  | 256   | 167  | 189   | 44   | 251   | 136  | 325   | 210  | 200   | 33    | 255   | 76    |
| 315 | Neu5Aca2-3Galβ1-3(Neu5Aca2-3Galβ1-4GlcNAcβ1-6)GalNAc-Sp14                                 | 109  | 26   | 400   | 32  | 883   | 303  | 1398  | 64   | 1013  | 123  | 4531  | 1096 | 7615  | 1655  | 9264  | 2263  |
| 316 | Neu5Aca2-3Galβ1-3(Neu5Aca2-6)GalNAc-Sp14                                                  | 1704 | 1141 | 327   | 181 | 301   | 61   | 349   | 80   | 425   | 88   | 523   | 113  | 543   | 399   | 2735  | 515   |
| 317 | Neu5Aca2-3Galβ1-3GalNAc-Sp14                                                              | 149  | 40   | 337   | 166 | 931   | 278  | 1007  | 116  | 2725  | 513  | 1331  | 165  | 3708  | 1461  | 45352 | 11643 |



|     |                                                                                                     |     |    |     |    |     |     |     |    |     |    |     |     |     |     |      |     |
|-----|-----------------------------------------------------------------------------------------------------|-----|----|-----|----|-----|-----|-----|----|-----|----|-----|-----|-----|-----|------|-----|
| 318 | Neu5Aca2-3Galβ1-4GlcNAcβ1-2Mana1-3(Neu5Aca2-6Galβ1-4GlcNAcβ1-2Mana1-6)Manβ1-4GlcNAcβ1-4GlcNAcβ-Sp12 | 149 | 70 | 105 | 32 | 228 | 28  | 160 | 51 | 240 | 96 | 253 | 168 | 473 | 142 | 4183 | 341 |
| 319 | Neu5Aca2-6Galβ1-4GlcNAcβ1-2Mana1-3(Galβ1-4GlcNAcβ1-2Mana1-6)Manβ1-4GlcNAcβ1-4GlcNAcβ-Sp12           | 93  | 26 | 146 | 60 | 517 | 471 | 152 | 25 | 183 | 35 | 228 | 33  | 347 | 29  | 751  | 83  |
| 320 | Neu5Aca2-6Galβ1-4GlcNAcβ1-2Mana1-3(GlcNAcβ1-2Mana1-6)Manβ1-4GlcNAcβ1-4GlcNAcβ-Sp12                  | 131 | 44 | 130 | 24 | 178 | 68  | 156 | 25 | 147 | 14 | 241 | 56  | 289 | 42  | 467  | 254 |

**Galectin-8 Promotes Cytoskeletal Rearrangement in Trabecular  
Meshwork Cells through Activation of Rho Signaling**

**Shiri Diskin<sup>\*,‡</sup>, Zhiyi Cao<sup>\*</sup>, Haiyan Gong<sup>§</sup>, Andrea Soza<sup>¶</sup>, Alfonso González<sup>¶</sup> and  
Noorjahan Panjwani<sup>\*,†,‡,#</sup>**

*From the <sup>\*</sup>New England Eye Center, Departments of Ophthalmology, <sup>†</sup>Biochemistry,  
and <sup>‡</sup>Anatomy and Cell Biology, Tufts University School of Medicine, Boston MA 02111,  
the <sup>§</sup>Department of Ophthalmology, Boston University School of Medicine, Boston MA  
02116, <sup>¶</sup>Departamento de Inmunología Clínica y Reumatología, Facultad de Medicina,  
Centro FONDAP de Regulación Celular y Patología, Facultad de Ciencias Biológicas,  
Pontificia Universidad Católica de Chile, Santiago 8330025, Chile, and Millennium  
Institute for Fundamental and Applied Biology (MIFAB), Santiago 7780272, Chile*

# Send all correspondence to Dr. Noorjahan Panjwani, Department of Ophthalmology  
Tufts University School of Medicine, 136 Harrison Avenue, Boston, MA 02111  
Telephone (617) 636-6776, Fax (617) 636-0348, e-mail: [Noorjahan.Panjwani@tufts.edu](mailto:Noorjahan.Panjwani@tufts.edu)

**Running Head: Galectin-8 Activates Rho Signaling in TM Cells**

Word Count: 6,628

**Purpose:** The trabecular meshwork (TM) cell-matrix interactions and factors that influence Rho signaling in TM cells are thought to play a pivotal role in the regulation of aqueous outflow. The current study was designed to evaluate the role of a carbohydrate-binding protein, galectin-8 (Gal8), in TM cell adhesion and Rho signaling. **Methods:** Normal human TM cells were assayed for Gal8 expression by immunohistochemistry and Western blot analysis. To assess the role of Gal8 in TM cell adhesion and Rho signaling, the cell adhesion and spreading assays were performed on Gal8-coated culture plates in the presence and the absence of anti- $\beta_1$  integrin antibody and Rho and Rho-kinase inhibitors. In addition, the effect of Gal-8-mediated cell-matrix interactions on TM cell cytoskeleton arrangement and myosin light chain (MLC) phosphorylation was examined. **Results:** We demonstrate here that Gal8 is expressed in the TM and a function-blocking anti- $\beta_1$  integrin antibody inhibits the adhesion and spreading of TM cells to Gal8-coated wells. Cell spreading on Gal8 substratum was associated with the accumulation of phosphorylated myosin light chain and the formation of stress fibers that was inhibited by the Rho inhibitor, C3 transferase, as well as by the Rho-kinase inhibitor, Y27632. **Conclusion:** The above findings present a novel function for Gal8 in activating Rho signaling in TM cells. This function may allow Gal8 to participate in the regulation of aqueous outflow.

## INTRODUCTION

Primary Open Angle Glaucoma (POAG) is a major cause for irreversible blindness. Factors that lead to the development of POAG are not yet fully known. It is clear, however, that elevated intraocular pressure is a major causal risk factor<sup>1</sup>. Elevation

in intraocular pressure is due to the dysfunction of outflow pathway tissues resulting in inadequate clearance of aqueous humor. Trabecular meshwork (TM) cell-matrix adhesion is crucial for the maintenance of the outflow pathway. In the short term, experimental procedures that cause loss of TM cell contact with the beams lead to a sharp increase in aqueous outflow<sup>2-4</sup>. In the long term, beams denuded of cells (typical of POAG eyes) tend to collapse on one another, blocking the outflow channels<sup>5</sup>. In recent years, a large body of research in the field of POAG has focused on the role of Rho signaling in the regulation of outflow facility through regulation of the TM actin cytoskeleton. The emerging paradigm is that the inhibition of Rho signaling leads to elevation in outflow facility, while induction of Rho signaling leads to increased resistance to outflow<sup>2, 6-8</sup>. In cultured TM cells, inhibitors of the Rho signaling cascade cause TM cell rounding, loss of stress fibers and focal adhesions and retraction of cell processes<sup>6, 9</sup>. In perfused human and animal eyes, inhibitors of Rho signaling cause TM cell rounding and detachment from the beams concomitant with a marked elevation in outflow facility<sup>2, 4</sup>. In nonocular studies, a carbohydrate-binding protein, galectin-8 (Gal8), has been shown to form high-affinity interactions with integrins, modulate cell-matrix interactions, and promote cell spreading by activating PI3K and the small GTPases, Ras and Rac<sup>10-12</sup>. Little is known about the role of the carbohydrate-mediated recognition systems in TM cell adhesion and signaling. In a recent study, we have observed that TM cells adhere to Gal8 substratum and that  $\beta_1$  integrins derived from TM cells bind to Gal8 in a carbohydrate-dependent fashion<sup>13</sup>. The role of Gal8 in the regulation of Rho signaling that modulates stress fiber formation and focal adhesion assembly has, thus far, not been investigated in any cell type. In the current study, we underscore for the first time the function of Gal8 in

modulating the Rho signaling pathway. We demonstrate here that: (i) TM cells adhere and spread on Gal8 coated wells in serum-free media; (ii)  $\beta_1$  integrin function-blocking antibody inhibits the adhesion and spreading of TM cells on Gal8-coated wells; (iii) cells adhered to Gal8 accumulate phosphorylated myosin light chain (MLC), and accumulation of MLC is associated with stress fiber formation that is abolished by the presence of either the Rho inhibitor, C3 transferase, or the Rho-kinase (ROCK) inhibitor, Y27632. These data lead us to propose that Gal8 promotes cytoskeletal rearrangement in TM cells through interaction with  $\beta_1$  integrins leading to activation of the Rho/ROCK/MLC signaling pathway.

## **MATERIALS AND METHODS**

### ***Immunohistochemical Detection of Galectin-8 in Human TM***

Human eyes with no known history of eye disease were obtained from the National Disease Research Interchange (Philadelphia, PA) within 24 h postmortem. The eyes were bisected by an equatorial incision and the anterior segment of the eye was cut into four quadrants. Tissues were fixed in formaldehyde (4% , 3 hr, 25°C) and were then processed for paraffin embedding. For immunostaining, longitudinal tissue sections (5  $\mu\text{m}$ ) were deparaffinized and sequentially treated with a basic pH antigen retrieval reagent (R&D systems, Minneapolis, MN), normal horse serum (R&D systems), goat anti-human Gal8 (2 hr, 37°C, R&D Systems; the goat antibody is specific for Gal8 and it does not recognize other galectins including Gal3 or Gal1<sup>\*</sup>), biotinylated anti-goat IgG (1 hr, 25°C, R&D Systems), a freshly prepared solution of avidin-biotin-complex (R&D Systems' Cell and Tissue Staining Kit, 30 min, 25°C) and a diaminobenzidine/H<sub>2</sub>O<sub>2</sub> reagent (R&D

systems). Control sections were processed the same way except that either the step involving incubation with the primary antibody was omitted or primary antibody was substituted with nonimmune goat serum (R&D systems).

### ***Preparation of Human TM Cell Cultures***

Normal human cadaver eyes (donor age 71-89 years) were obtained from the Central Florida Lions Eye Bank (Tampa, FL). All eyes were enucleated within 6 hr postmortem and tissues were explanted for culture within 24 hours postmortem. TM cells were grown in tissue culture as described previously<sup>14</sup>. Cultures were propagated in DMEM supplemented with 10% FBS and cells were used at third to fourth passage. Consistent with published studies, these cells expressed aquaporin1 and CD44, and, when treated with Dexamethasone, markedly upregulated the expression of myocilin. (Not Shown, expression levels of CD44 and myocilin were detected by Western blot and RT-PCR analyses, respectively, and the expression of aquaporin1 was detected in a microarray study using 48.5 Illumina HEEBO oligo microarrays [Microarrays, Inc. Nashville, TN]).

### ***RT-PCR Amplification of Galectin-8***

Confluent cultures of TM cells from two different donors were subjected to RNA extraction using the RNEasy RNA extraction kit (Qiagen, Valencia, CA). On-column DNase (Qiagen) digestion was performed during RNA purification to avoid any DNA contamination. Reverse transcription was performed on total RNA (1 µg) with random primers (Invitrogen) in the presence or the absence of reverse transcriptase (RT) (Super Script II, Invitrogen). Primer Sequences: 5' ccc/tgt/tct/ctt/gag/ctt/cg 3' and 5' cac/tgg/gga/agg/agt/tgt/gt 3', were chosen for an expected product size of 191 bp. PCR

products were electrophoresed on 1% agarose gel, and sequenced at the Tufts University Core Facility.

### ***Quantitative RT-PCR***

To assess the abundance of Gal8 expression in TM, the expression level of Gal8 was compared with that of GAPDH by quantitative RT-PCR. Quantitative RT-PCR was performed using the Mx4000 real-time PCR machine (Stratagene, La Jolla, CA). Briefly, cDNA was synthesized from 25 ng total RNA using the High Capacity cDNA Archive Kit (Applied Biosystems, Foster City, CA) according to the manufacturer's instructions. PCR was carried out in triplicates using inventory gene-specific primers (Gal8:HS00180706; GAPDH: HS99999905, Applied Biosystems) and the TaqMan Universal PCR Master Mix containing ROX as a passive reference. Reactions performed in the absence of template served as negative controls. Fluorescent signals were recorded once per cycle with a detector corresponding to FAM. To normalize the non-PCR related fluctuations between wells, each fluorescent reporter signal was measured against the ROX (internal reference dye) signal. Amplification plots showing the increase in the FAM fluorescence with each cycle of PCR ( $\Delta R_n$ ) were generated and threshold cycle values ( $C_t$ ) were calculated for all samples. The  $C_t$  value represented the PCR cycle number at which the fluorescence was detectable above a threshold based on the variability of the baseline data during the first 15 cycles. All  $C_t$  values were obtained in the exponential phase.

### ***Western Blot Analysis***

To detect the expression of Gal8 in TM cells, 0.6 ml of cold radioimmunoprecipitation (RIPA) buffer containing a protease inhibitor cocktail (Roche Diagnostic, Mannheim,

Germany) was added to washed confluent cell cultures. Since Gal8 is a carbohydrate binding protein with high affinity towards  $\beta$ -lactose, a  $\beta$ -lactose affinity chromatography assay was used. After 30 min on ice, cell extracts were clarified by centrifugation and were incubated with Sepharose beads conjugated with  $\beta$ -lactose (EY labs, San Mateo, CA) for 1 hr at 4°C. Following the incubation period, the beads were washed with Triton X-100, eluted first with a non-competing sugar, sucrose towards which Gal8 has no affinity (100mM in PBS-Triton), and then with  $\beta$ -lactose (100mM in PBS-Triton). Eluates were dialyzed and then analysed by SDS-PAGE. Protein blots were stained with Ponceau S (Sigma) and were then processed for immunostaining using goat anti-human Gal8 as a primary antibody (R&D Systems, 1 hr, 25°C), peroxidase-labeled anti-goat IgG (Vector Labs) as a secondary antibody, and a chemiluminescence detection system (Perkin Elmer, Boston, MA).

#### ***Preparation of Recombinant Human Glutathione-S-Transferase Tagged Galectin-8***

Recombinant human glutathione-S-transferase (GST) tagged Gal8, was produced and purified as previously described<sup>12</sup> with a few modifications. Lysates of bacteria expressing GST-Gal8 (2L culture) were chromatographed on a  $\beta$ -lactose-conjugated Sepharose column (EY Labs; 1 ml bed volume). After allowing Gal8 to bind to the affinity matrix, the gel bed was washed first with wash buffer I (20 ml of 20 mM Tris-HCl pH 7.4, 150 mM NaCl, 2 mM EDTA, 0.2 mM PMSF, 4 mM  $\beta$ -mercaptoethanol) and then with 10 ml of wash buffer II (PBS containing 0.2 mM PMSF, 4 mM  $\beta$ -mercaptoethanol). GST-Gal8 was eluted from the column with 10 ml wash buffer II containing 100mM  $\beta$ -lactose. Fractions containing the lectin were dialyzed against PBS containing 2% glycerol and 4 mM  $\beta$ -mercaptoethanol and stored at -80°C.



### ***Quantification of Cell Adhesion and Spreading***

To assess the adhesion and spreading of TM cells onto different substrates, 96-well microtiter plates were coated with Gal8 (30  $\mu\text{g/ml}$ ), human fibronectin from placenta (Sigma) (30  $\mu\text{g/ml}$ ), and poly-L-lysine (Sigma) (100  $\mu\text{g/ml}$ ). Gal8 was prepared as described above. Confluent TM cultures were dissociated with freshly prepared 5 mM EDTA (Invitrogen) in  $\text{Ca}^{2+}$  free PBS (Invitrogen) and plated in serum-free DMEM on microtiter plates coated with Gal8 and other substrates described above (50,000 cells/well, 3 wells/group). Following incubation (4hr, 37°C), cells were washed with PBS and stained with Giemsa stain (Diff Quik stain set, Dade Behring, Newark, DE). Plates were scanned with an Epson Perfection 4490 scanner and approximate cell density was assessed using image-analysis software (Gene Tools, Synoptics, Cambridge, England). Micrographs were taken on a Nikon Eclipse TE200 inverted microscope (Nikon, Melville, NY) equipped with a Spot camera (Diagnostic Instruments, Sterling Heights, MI). Ten random fields of each experimental condition were photographed, and spread cells were counted manually. One thousand cells were counted at each condition and the percent spread cells was calculated. Statistical significance was calculated with an unpaired student *t*-test. To assess the involvement of  $\beta_1$ -integrins in the adhesion and spreading of TM cells on Gal8, cells were incubated in the presence of JB1A, a function-blocking monoclonal mouse antibody raised against human  $\beta_1$ -integrin (Chemicon, Temecula, CA). The JB1A antibody binds to a specific regulatory epitope (amino acids: 82 to 87) on  $\beta_1$  integrin that is distinct from the RGD binding site (amino acids: 140-164)<sup>15</sup>. The antibody binding to this epitope locks the integrin in an inactive conformation and does not allow it to be activated regardless of the nature of the ligand presented<sup>16</sup>. This antibody has

been shown to interfere with the adhesion of various cell types to a number of ECM substrates including fibronectin and collagen I<sup>17-21</sup>.

### ***Detection of Cytoskeletal Changes in Human TM Cells Adhered to Galectin-8***

Eight-chamber glass slides were coated with Gal8 (30 µg/ml), human fibronectin from placenta (Sigma) (30 µg/ml), and poly-L-lysine (Sigma) (100 µg/ml). Confluent TM cultures were dissociated with EDTA and were plated on Gal8-coated slides (10,000 cells/ chamber in serum-free DMEM). Following 4 hr incubation at 37°C, cells were washed, fixed and stained with rhodamine-labeled phalloidin as previously described<sup>9</sup>. To assess the involvement of Rho signaling in stress-fiber formation in cells adhered to Gal8, assays were performed in the presence of the ROCK inhibitor, Y27632 (5-20 µM) (Sigma), or the Rho specific inhibitor, C3 transferase from *clostridium botulinum* (1-2 µg/ml; Cytoskeleton, Denver, CO). This enzyme is a highly specific inhibitor of Rho that does not affect other Rho family members such as Rac or cdc42. It is a ribosyltransferase that by modifying the Asn 41 residue of Rho, renders it biologically inactive<sup>22</sup>. To assess the cytotoxicity of C3 transferase and Y27632, cells were stained with ethidium homodimer III (Biotium Inc. Hayward, CA) and Hoechst 33342 (Biotium) according to the manufacturer's instructions. As opposed to Hoechst 33342, which is cell permeable and can stain DNA in live cells, ethidium homodimer III is not cell permeable, and, therefore, can only stain DNA in necrotic cells whose membrane is disrupted. Experiments were carried out in triplicates. Random fields of each experimental condition were photographed and dead cells were counted manually. Tert butyl hydroperoxide (tBH, 3.5 mM), a potent cytotoxic reagent, was used as a positive control in this assay.

### ***Detection of Myosin Light Chain Phosphorylation in TM Cells Adhered to Galectin-8***

In an effort to further confirm the involvement of Rho signaling in stress fiber formation in TM cells adhered to Gal8, confluent TM cell cultures were dissociated with EDTA and plated on Gal8, fibronectin or poly-L-lysine-coated dishes. After 4 hour incubation (37°C), phosphorylated proteins were isolated using a phosphoprotein affinity chromatography kit (PhosphoProtein purification kit, Qiagen), according to the manufacturer's instructions and were subjected to SDS-PAGE. Protein blots of the gels were immunostained using a rabbit anti-MLC (16hr, 4°C; Cell Signaling Technology, Danvers, MA) as a primary antibody and peroxidase-labeled anti-rabbit IgG (Vector Labs) as a secondary antibody. Relative band intensity was quantified by the image analysis software, Image J, provided by the National Institutes of Health (Bethesda, MD). Immunoblot band intensity among different samples was normalized based on Ponceau S band intensity for the purpose of inter-sample comparisons.

## **RESULTS**

### ***Galectin-8 is Expressed in Human TM Tissue and in Cultured TM Cells***

Multiple techniques including RT-PCR, Western blot and immunohistochemical staining were used to detect Gal8 expression in TM. In immunohistochemical staining, anti-Gal8 reacted strongly with the TM cells on beams (Figure 1A i, arrows) and with TM cells in the juxtacanalicular region (Figure 1A i, arrowheads). Some staining was observed in the ECM in all parts of the tissue and in the wall of Schlemm's canal (Figure 1A i, SC). No staining was observed when sections were not exposed to a primary antibody (Figure 1A, ii) or exposed to nonimmune goat IgG (Not Shown). To assess the expression of Gal8 in

human cultured TM cells, RT-PCR experiments were performed on total RNA preparations from two different donors. All RNA preparations produced the expected size Gal8 (191bp) product (Figure 1Bi). In all cases, when reaction mixtures lacked RT, no components were amplified (Figure 1B i). Bands were isolated from the gel and sequenced. The product was found by BLAST analysis to be 98% identical to the published Gal8 cDNA sequence <sup>11</sup>. To assess the abundance of Gal8 expression in TM, the expression level of Gal8 was compared with that of GAPDH by quantitative RT-PCR. The qPCR experiments were performed in triplicates on whole RNA extracts from cultured TM cells derived from two different donors. In each case, a robust Gal8 signal was detected (Ct: 37.37 and 33.38 for Gal8 and GAPDH, respectively) (Figure 1B ii). To verify Gal8 protein expression, TM cell lysates were incubated with  $\beta$ -lactose conjugated beads, proteins bound to the beads were eluted first with sucrose, a non-competing sugar, and then with  $\beta$ -lactose, a competing sugar. Both the lactose eluate (Figure 1B iii, right panel, lane *L*) and the unfractionated total extract (Figure 1B iii, right panel, lane *T*) contained a major anti-Gal8-reactive 36-kDa band, which is the published molecular weight for human Gal8 <sup>11</sup>. This band was absent from the sucrose eluate as well as from the unbound fraction (Figure 1B iii, right panel, lanes *S* and *UB*). Many other protein bands in both the total extract and unbound fractions that were detected by Ponceau S staining (Figure 1B iii, left panel, lanes *UB* and *T*) were not stained with anti-Gal8, thereby attesting to the high specificity of the antibody. No bands were visible in control immunoblots that were not exposed to primary antibody (Not Shown).

### ***TM Cell Adhesion and Spreading on Gal8 is Mediated by $\beta_1$ Integrins***

In a recent study, we have observed that TM cells adhere to and spread on Gal8 substratum and that  $\beta_1$  integrins derived from TM cells bind to Gal8 in a carbohydrate-dependent fashion<sup>13</sup>. Because  $\beta_1$  integrins are known to play a central role in cell adhesion and spreading<sup>19, 20, 23</sup>, we sought to determine whether the adhesion and spreading of TM cells to Gal8 is mediated by  $\beta_1$  integrins. For this, we conducted the cell adhesion assay in the presence and the absence of a function-blocking anti- $\beta_1$  integrin antibody (JB1A). Anti- $\beta_1$  integrin antibody inhibited cell adhesion to Gal8 by about 45%, similar to the extent of inhibition of cell adhesion to fibronectin (Figure 2A). The antibody had no effect on cell adhesion to poly-L-lysine and control IgG inhibited cell adhesion to Gal8 by only 7% (Figure 2A). Microscopic examination revealed that anti- $\beta_1$  integrin antibody abolished cell spreading on Gal8-coated wells (80% reduction of cell spreading), whereas control IgG had no such effect (Figure 2B). These data suggest that TM cell adhesion and, in particular spreading on Gal8, is mediated by one or more  $\beta_1$  integrins.

### ***Galectin-8 Promotes Rearrangement of Cytoskeleton and Modulates Rho Signaling in TM Cells***

Having established that Gal8 modulates TM cell spreading, it was of interest to determine whether the lectin has the capacity to influence the structure of cytoskeleton and Rho signaling. To determine whether Gal8 promotes rearrangement of the actin cytoskeleton, TM cells incubated on slides coated with Gal8 were stained with rhodamine-labeled phalloidin. Slides coated with human fibronectin and poly-L-lysine served as positive and negative controls, respectively. Cells incubated on Gal8 for 30 min appeared round and

showed membrane protrusions (Figure 3a, red arrow). Following 1 hr incubation, cells began to spread and the actin cytoskeleton showed punctate staining, suggesting the presence of short actin bundles (Figure 3b, green arrow). At 2 hr, initial stress fibers were seen (Figure 3c, white arrow) and by 4 hr the cells were fully spread and contained stress fibers aligned along the longitudinal axes of the cells (Figure 3d). A very similar transition from rounded cells with punctate actin staining to spread cells with stress fibers was observed in cells adhered to fibronectin, albeit with a different timeline, as cells presented cortical stress fibers by 1 hr and fully developed, longitudinally arranged stress fibers appeared by 2 hr (Figure 3 i-l). In contrast, cells adhered to poly-L-lysine retained their rounded shape and punctate actin staining up to 4 hr incubation in serum-free medium (Figure 3 e-h). These results suggest that the interaction between integrins and Gal8 which leads to cell spreading is indeed mediated through rearrangement of the actin cytoskeleton and formation of stress fibers. To determine whether stress fiber formation in TM cells adhered to Gal8 is mediated by Rho GTPase; we conducted the cytoskeletal rearrangement assay in the presence of C3 transferase. Cells incubated on Gal8 for 4 hr, showed fully developed stress fibers (Figure 4A a). When cells were incubated on Gal8-coated glass slides in the presence of C3, the formation of actin stress fibers was significantly reduced (Figure 4A, b and c). Cells were spread, but only a few isolated stress fibers formed, and actin staining became predominantly punctate, suggesting short bundles.

A key regulator of actin cytoskeleton is the small GTPase Rho<sup>24-26</sup>. One of the effector proteins of Rho is the Rho-kinase, also known as Rho associated coiled coil kinase (ROCK). To assess the involvement of ROCK in the formation of stress fibers in

TM cells adhered to Gal8, we conducted the cytoskeletal rearrangement assay in the presence of a well characterized ROCK inhibitor, Y27632. At all concentrations tested (5-20  $\mu$ M), in the presence of Y27632, no stress fibers formed in TM cells adhered to Gal8. Instead, all actin staining in the cells was in the form of punctate staining, suggesting the presence of short bundles (Figure 4A d-f). Despite these profound effects, neither Y27632 nor C3 transferase were cytotoxic to TM cells (Figure 4B). Together, these results suggest that Gal8 promotes stress fiber formation in TM cells through activation of Rho signaling and that the pathway for this effect runs through ROCK. Activated ROCK promotes the accumulation of phosphorylated MLC which, in turn, promotes the formation of stress fibers<sup>27</sup>. To find whether MLC is phosphorylated in TM cells adhered to Gal8; we analyzed the phospho-MLC content of the cells by isolating phosphoproteins and immunoblotting the phosphorylated fraction with a MLC antibody. TM cells adhered to Gal8 showed a time-dependent accumulation of phosphorylated MLC (Figure 5A *top right* and *bottom left* panels). The extent of accumulating phosphorylated MLC on Gal8-coated wells was similar to that seen in cells adhered to fibronectin (Figure 5, *bottom right* panel). Together, these data suggest a novel activity for Gal8 involving induction of the Rho/ROCK/MLC pathway leading to cell spreading and stress fiber formation.

## DISCUSSION

Perturbation of the outflow of the aqueous humor leads to elevation in intraocular pressure, which is one of the major causal risk factors for vision loss in POAG<sup>1</sup>. The dynamic structure of the TM cells actin cytoskeleton with its focal adhesions is an

important determinant of outflow facility. Reagents that disrupt the actin cytoskeleton such as cytochalasins, lantrunculin and H-7, cause elevation in outflow facility as well as loss of TM cell contact with the beams and neighboring cells<sup>28-31</sup>. Our data support the hypothesis that Gal8 can regulate TM actin cytoskeleton. TM cell adhesion to Gal8 was followed by cell spreading and actin cytoskeleton rearrangement, showing gradual actin polymerization into stress fibers over time in adhered cells. A key regulator of actin cytoskeleton is the small GTPase Rho<sup>24-26</sup>. Activated (GTP-bound) Rho interacts with ROCK and activates its kinase activity. This in turn, phosphorylates and inactivates MLC phosphatase, and also phosphorylates MLC directly. The phosphorylation of MLC leads to rearrangement of cytoskeleton and stress fiber formation<sup>27</sup>. Recent studies have shown that phosphorylation of MLC in TM cells is dependent on activation of the Rho/ROCK signaling pathway<sup>8,9</sup>. In the current study, we demonstrate for the first time that Gal8 can modulate Rho GTPase signaling. Our findings that spreading of TM cells on Gal8 is associated with the accumulation of phosphorylated MLC and that inhibitors of Rho as well as of ROCK attenuate TM cell spreading and stress fiber formation, suggest that Gal8 has the ability to participate in the regulation of the Rho/ROCK/MLC signaling pathway in TM cells. Rho signaling has been intimately linked to the regulation of outflow facility. Specific inhibitors of ROCK, Y27632<sup>6,7</sup> and H1152<sup>8</sup> have been shown to increase outflow facility in whole monkey and porcine eyes in a time- and dose-dependent manner. Likewise, in a perfused human eye, dominant negative RhoA<sup>2</sup> and dominant negative ROCK<sup>4</sup> caused a marked increase in outflow facility, TM cell rounding and detachment from the beams. In cultured TM cells, delivery of a dominant



negative RhoA<sup>2</sup> and dominant negative ROCK<sup>4</sup> caused disruption of the actin cytoskeleton, TM cell rounding, loss of stress fibers and focal adhesions.

The current study has focused on characterization of Gal8 effects on normal TM cells. The relevance of these effects to the pathogenesis of POAG needs to be investigated further. The LGALS8 gene encodes six different isoforms of Gal8, resulting from alternative splicing and the use of multiple polyadenylation signals<sup>32</sup>. Different isoforms differ in the length of their hinge peptide<sup>32</sup>. It has been shown that isoforms with a short hinge peptide are severely impaired in their biological activity, they are profoundly less capable of promoting cell adhesion and of inducing outside-in signaling<sup>33</sup>. In a recent study conducted in our lab<sup>34</sup>, glycogene expression patterns were compared between normal and glaucomatous TM tissues, using a specialized glycogene microarray, GLYCOv2 (Consortium for Functional Glycomics). While this study revealed no differences in Gal8 expression levels between normal and glaucomatous TM tissues, the Gal8 probes used in the GLYCOv2 microarray were not designed to detect the alternatively spliced isoforms of Gal8 with the different hinge peptide lengths. Thus, one cannot eliminate the possibility that normal and glaucomatous TM may express distinct isoforms of Gal8 resulting in different effects on the tissues. A different regulatory mechanism may involve not Gal8 itself but its coreceptors. TM cells treated with dexamethasone show elevated expression levels of  $\alpha_v$  integrin<sup>35</sup> which we previously found to bind to Gal8<sup>13</sup>. It is possible that glaucomatous TM cells bearing more coreceptors for Gal8 are more susceptible to its effects.

In conclusion, data presented in the current study suggest a novel function for Gal8 in activation of Rho signaling and the regulation of TM cell cytoskeleton. It lays a

foundation for exploration of a possible role for Gal8 in regulation of aqueous outflow and the pathogenesis of POAG.

1. Weinreb RN, Khaw PT. Primary open-angle glaucoma. *Lancet* 2004;363:1711-1720.
2. Vittitow JL, Garg R, Rowlette LL, Epstein DL, O'Brien ET, Borrás T. Gene transfer of dominant-negative RhoA increases outflow facility in perfused human anterior segment cultures. *Mol Vis* 2002;8:32-44.
3. Johnson M. 'What controls aqueous humour outflow resistance?' *Exp Eye Res* 2006;82:545-557.
4. Rao PV, Deng P, Maddala R, Epstein DL, Li CY, Shimokawa H. Expression of dominant negative Rho-binding domain of Rho-kinase in organ cultured human eye anterior segments increases aqueous humor outflow. *Mol Vis* 2005;11:288-297.
5. Polansky J, Alvarado J. Cellular mechanisms influencing the aqueous humor outflow pathway. In: DM A, FA J (eds), *Principles and practice of ophthalmology: basic science*. Philadelphia: W. B. Saunders Co.; 1994:226-251.
6. Koga T, Koga T, Awai M, Tsutsui J, Yue BY, Tanihara H. Rho-associated protein kinase inhibitor, Y-27632, induces alterations in adhesion, contraction and motility in cultured human trabecular meshwork cells. *Exp Eye Res* 2006;82:362-370.
7. Tian B, Kaufman PL. Effects of the Rho kinase inhibitor Y-27632 and the phosphatase inhibitor calyculin A on outflow facility in monkeys. *Exp Eye Res* 2005;80:215-225.
8. Rao PV, Deng P, Sasaki Y, Epstein DL. Regulation of myosin light chain phosphorylation in the trabecular meshwork: role in aqueous humour outflow facility. *Exp Eye Res* 2005;80:197-206.
9. Rao PV, Deng P-F, Kumar J, Epstein DL. Modulation of Aqueous Humor Outflow Facility by the Rho Kinase-Specific Inhibitor Y-27632. *Invest Ophthalmol Vis Sci* 2001;42:1029-1037.
10. Levy Y, Arbel-Goren R, Hadari YR, et al. Galectin-8 functions as a matricellular modulator of cell adhesion. *J Biol Chem* 2001;276:31285-31295.
11. Levy Y, Ronen D, Bershadsky AD, Zick Y. Sustained induction of ERK, protein kinase B, and p70 S6 kinase regulates cell spreading and formation of F-actin microspikes upon ligation of integrins by galectin-8, a mammalian lectin. *J Biol Chem* 2003;278:14533-14542.
12. Carcamo C, Pardo E, Oyanadel C, et al. Galectin-8 binds specific beta1 integrins and induces polarized spreading highlighted by asymmetric lamellipodia in Jurkat T cells. *Exp Cell Res* 2006;312:374-386.
13. Diskin S, Cao Z, Leffler H, Panjwani N. The Role of Integrin Glycosylation in Galectin-8-Mediated Trabecular Meshwork Cell Adhesion and Spreading. *Glycobiology*, Submitted Manuscript.
14. Stamer WD, Seftor RE, Williams SK, Samaha HA, Snyder RW. Isolation and culture of human trabecular meshwork cells by extracellular matrix digestion. *Curr Eye Res* 1995;14:611-617.

15. Shiokawa S, Yoshimura Y, Sawa H, et al. Functional Role of Arg-Gly-Asp (RGD)-Binding Sites on  $\beta$ 1 Integrin in Embryo Implantation Using Mouse Blastocysts and Human Decidua. *Biol Reprod* 1999;60:1468-1474.
16. Ni H, Wilkins JA. Localisation of a novel adhesion blocking epitope on the human beta 1 integrin chain. *Cell Adhes Commun* 1998;5:257-271.
17. Shen CX, Stewart S, Wayner E, Carter W, Wilkins J. Antibodies to different members of the beta 1 (CD29) integrins induce homotypic and heterotypic cellular aggregation. *Cell Immunol* 1991;138:216-228.
18. Stupack DG, Stewart S, Carter WG, Wayner EA, Wilkins JA. B lymphocyte fibronectin receptors: expression and utilization. *Scand J Immunol* 1991;34:761-769.
19. Wu Y, Chen L, Zheng PS, Yang BB. beta 1-Integrin-mediated glioma cell adhesion and free radical-induced apoptosis are regulated by binding to a C-terminal domain of PG-M/versican. *J Biol Chem* 2002;277:12294-12301.
20. Chen N, Chen C-C, Lau LF. Adhesion of Human Skin Fibroblasts to Cyr61 Is Mediated through Integrin alpha 6beta 1 and Cell Surface Heparan Sulfate Proteoglycans. *J Biol Chem* 2000;275:24953-24961.
21. Dallabrida SM, Falls LA, Farrell DH. Factor XIIIa supports microvascular endothelial cell adhesion and inhibits capillary tube formation in fibrin. *Blood* 2000;95:2586-2592.
22. Wilde C, Aktories K. The Rho-ADP-ribosylating C3 exoenzyme from *Clostridium botulinum* and related C3-like transferases. *Toxicon* 2001;39:1647-1660.
23. Zhou L, Zhang SR, Yue BY. Adhesion of human trabecular meshwork cells to extracellular matrix proteins. Roles and distribution of integrin receptors. *Invest Ophthalmol Vis Sci* 1996;37:104-113.
24. Ridley A. Rho family proteins and the regulation of the actin cytoskeleton. In: Jeanteur P (ed), *Progress in molecular and subcellular biology*. New York,: Springer-Verlag.; 1999:1-16.
25. Barry ST, Flinn HM, Humphries MJ, Critchley DR, Ridley AJ. Requirement for Rho in integrin signalling. *Cell Adhes Commun* 1997;4:387-398.
26. Uehata M, Ishizaki T, Satoh H, et al. Calcium sensitization of smooth muscle mediated by a Rho-associated protein kinase in hypertension. *Nature* 1997;389:990-994.
27. Kaibuchi K. Regulation of cytoskeleton and cell adhesion by rho targets. In: Jeanteur P (ed), *Progress in molecular and subcellular biology*. New York,: Springer-Verlag.; 1999:23-34.
28. Kaufman PL, Erickson KA. Cytochalasin B and D dose-outflow facility response relationships in the cynomolgus monkey. *Invest Ophthalmol Vis Sci* 1982;23:646-650.
29. Tian B, Gabelt BT, Geiger B, Kaufman PL. Combined effects of H-7 and cytochalasin B on outflow facility in monkeys. *Exp Eye Res* 1999;68:649-655.
30. Tian B, Kaufman PL, Volberg T, Gabelt BT, Geiger B. H-7 disrupts the actin cytoskeleton and increases outflow facility. *Arch Ophthalmol* 1998;116:633-643.
31. Peterson JA, Tian B, McLaren JW, Hubbard WC, Geiger B, Kaufman PL. Latrunculins' Effects on Intraocular Pressure, Aqueous Humor Flow, and Corneal Endothelium. *Invest Ophthalmol Vis Sci* 2000;41:1749-1758.
32. Bidon N, Brichory F, Bourguet P, Le Pennec JP, Dazord L. Galectin-8: a complex sub-family of galectins (Review). *Int J Mol Med* 2001;8:245-250.

33. Levy Y, Auslender S, Eisenstein M, et al. It depends on the hinge: a structure-functional analysis of galectin-8, a tandem-repeat type lectin. *Glycobiology* 2006;16:463-476.
34. Diskin S, Kumar J, Cao Z, et al. Detection of differentially expressed glycogenes in trabecular meshwork of eyes with primary open-angle glaucoma. *Invest Ophthalmol Vis Sci* 2006;47:1491-1499.
35. Dickerson JE, Jr., Steely HT, Jr., English-Wright SL, Clark AF. The effect of dexamethasone on integrin and laminin expression in cultured human trabecular meshwork cells. *Exp Eye Res* 1998;66:731-738.

## ACKNOWLEDGEMENTS

This work was supported by National Institutes of Health Grants R03EY015168 (N.P.), a core grant for vision research P30EY13078, Mass Lions Eye Research fund and a grant from Research to Prevent Blindness. A.G. was funded by Grants FONDECYT#1050715 and FONDAP#19800001. We thank Drs. Teresa Borrás, Janardan Kumar and Deniz Toksoz-Exley for helpful discussions.

## FIGURE LEGENDS

**Figure 1: Galectin-8 is expressed in the Trabecular Meshwork (TM).** **A:** paraffin sections of anterior chamber angle from a normal human eye were immunostained with anti-Gal8 antibody. (i) anti-Gal8 IgG reacted intensely with cells on the trabecular beams (arrows) and with cells in the juxtacanalicular portion of TM (arrowheads). Staining was also observed in the ECM of both portions of TM (JCT and CS) and in the wall of Schlemm's canal. (ii) no staining was observed when the sections were not exposed to the primary antibody. Sections exposed to control goat IgG were identical to those exposed to no primary antibody (not shown). *SC*- Schlemm's canal, *JCT*-

juxtacanalicular TM; *CS beams*- corneoscleral beams. Bar: 25 $\mu$ m. **B:** (i) *RT-PCR*. Total RNA (1.0  $\mu$ g) from confluent cultures of normal human TM cells was subjected to RT-PCR. The expected 191bp fragment was amplified using Gal8- specific-primers. In each case, no components were amplified when reaction mixtures lacked reverse transcriptase (RT). (ii) *qRT-PCR*. Total RNA was subjected to Taq-Man RT-PCR using Gal8 specific primers. Original amplification plots of Gal8 and GAPDH mRNAs genes are shown (Ct 37.37 and 33.38 for Gal8 and GAPDH, respectively). N=3 for each experiment; all experiments were performed twice using TM cells from two different donors with reproducible results. (iii) *Western Blot Analysis*. Protein extracts from confluent cultures of normal human TM cells were incubated with lactogel beads and eluted first with sucrose, a non-competing sugar, and then with lactose, a competing sugar. Eluted proteins were electrophoresed, the protein blot of the gel was stained with Ponceau S and was then processed for immunostaining with goat anti-Gal8. Both the total cell extract (*T*) and the lactose eluate (*L*) contained a major 36-kDa anti-Gal8 reactive component. This component was not detected in the unbound fraction (*UB*) and in the sucrose eluate (*S*). Many protein bands in both the total extract and unbound fractions that were detected by Ponceau S staining were not stained with the anti-Gal8 antibody thereby attesting to the high specificity of the antibody.

**Figure 2: TM cell adhesion and spreading on Gal8 is mediated by  $\beta_1$  integrins.**

**A: Cell adhesion study.** Normal human TM cells incubated on microtiter wells coated with Gal8, fibronectin, or poly-L-lysine (37°C, 7% CO<sub>2</sub>, 2 hr) in serum-free DMEM, in the presence and absence of a function-blocking anti- $\beta_1$  integrin antibody or control mouse IgG. Following incubation, cells were fixed and stained with Giemsa.

Approximate cell density of adhered cells in each well, as measured by image analysis software, is shown. Note that the function-blocking anti- $\beta_1$  integrin antibody inhibited cell adhesion to Gal8 by about 50%, but that control IgG had no significant inhibiting effect. Anti- $\beta_1$ -integrin antibody interfered with cell adhesion to fibronectin, but not to poly-L-lysine, a substrate to which adhesion is not integrin mediated. Cell density of a single fibronectin-coated well was set as 100% (positive control); cell density in other wells is presented as percent of positive control. **B: Cell spreading study.** Ten random fields of each experimental condition were photographed, and spread cells were counted manually. Percent spread cells for cells adhered to Gal8 in the presence of anti-integrin and control IgG is shown in panel Bi. Anti- $\beta_1$  integrin antibody inhibited cell spreading on Gal8 by about 80% while control IgG had no effect. Representative micrographs of TM cells incubated in the presence and the absence of anti- $\beta_1$ -integrin antibody are shown in panel Bii. Arrows, unspread cells; arrowheads, spread cells. Mean value  $\pm$  standard deviation are shown (N=3), \*,  $P < 0.05$  compared to incubation without antibody. This experiment was performed three times with reproducible results.

**Figure 3: Galectin-8 promotes cytoskeletal rearrangement in TM cells.** Normal human TM cells were plated on eight-chamber glass slides coated with recombinant human Gal8, fibronectin, or poly-L-lysine in serum-free DMEM for 30 min, 1, 2 and 4 hr (37°C, 7% CO<sub>2</sub>). Following the incubation period, cells were fixed in formaldehyde and stained with rhodamine-labeled phalloidin. After 30 min incubation on Gal8 (a), cells have adhered, but are round, and show membrane protrusions (red arrow); following 1 hr incubation (b), membrane protrusions are still present (red arrow), but cells have begun to spread, and punctate actin staining is apparent (green arrow) suggesting the formation of

short actin bundles; following 2 hr incubation (c), cells have fully spread, initial stress fibers are seen (white arrow), but punctate actin staining is still abundant (green arrow); and by 4 hr (d), the cells contain fully developed stress fibers aligned along the longitudinal axes of the cells (white arrow). Cells adhered to poly-L-lysine maintained their round shape, membrane protrusions and some punctate actin staining throughout the incubation timeline. These cells did not develop stress fibers (e-h). Cells adhered to FN (i-l), developed cortical stress fibers as early as 1hr (j) and were fully spread with longitudinally arranged fibers by 2hr (k). Blue, DAPI; Red, phalloidine. Magnification bar, 50µm.

**Figure 4: Rho and ROCK inhibitors inhibit Galectin-8 induced stress fiber formation.** **A:** Normal human TM cells were incubated on chamber glass slides coated with recombinant human Gal8 (37°C, 7% CO<sub>2</sub>, 4 hr) in the absence (a) or the presence of the Rho inhibitor, C3 transferase, at 1 µg/ml (b) or 2 µg/ml (c) ; or the ROCK inhibitor, Y27632, at 5µM (d), 10µM (e) or 20µM (f). Following the incubation period, cells were fixed in formaldehyde and stained with rhodamine-labeled phalloidin. Stress fibers were prominent in cells plated on Gal8-coated wells (a, white arrows). Note that both Y27632 and C3 transferase interfered with the formation of actin stress fibers (b-e); both inhibitors caused a shift towards predominance of punctate actin staining, suggesting short actin bundles (green arrows). Neither inhibitor had any effect on the actin cytoskeleton of cells adhered to poly-L-lysine (not shown). This experiment was performed three times with reproducible results. **B:** *Rho and ROCK inhibitors are not cytotoxic to TM cells:* Cells were incubated on glass slides coated with recombinant

human Gal8 in the absence (a) or the presence of: Y27632 at 20 $\mu$ M (b), or C3 transferase at 2  $\mu$ g/ml (c) or tert-butyl hydroperoxide (tBH) at 3.5 mM (d), which served as a positive control for cytotoxicity. Following the incubation period, cells were washed and stained with ethidium homodimer III (red) which stains dead cells and Hoechst 33342 (blue) which stains nuclei of both living and dead cells. In the *left panel* are representative micrographs from each group showing no significant cell death in the presence of Y27632 (b) or (c) C3 transferase and significant cell death in the presence of tBH (d). Random fields of each experimental condition were photographed, and dead cells were counted manually. Percent dead cells for cells adhered to Gal8 in the presence of the different inhibitors are shown in the *right panel*. Mean values  $\pm$  standard deviation are shown (N=3).

**Figure 5: Galectin-8 promotes phosphorylation of myosin light chain.** Normal human TM cells were incubated on Gal8-coated 100-mm dishes for 0.5, 1, 2 and 4 hr. Following incubation, cells were lysed, and protein extracts were subjected to affinity chromatography using a phosphoprotein affinity column. Bound fraction was electrophoresed on SDS-polyacrylamide gel and gel blots were stained with Ponceau S (*Top Left*) and were then processed for immunostaining with anti-myosin light chain antibody (*Top Right*). Phosphoproteins isolated from cells incubated on fibronectin and poly-L-lysine for 4 hr served as positive and negative controls respectively. The expected MLC band of 20-kDa appeared in the phosphorylated fraction of all cell lysates. Approximate band intensity was quantified by image analysis software and normalized to Ponceau S staining. In *lower left panel* the accumulation of phosphorylated MLC over



time in TM cells adhered to Gal8 is plotted. In *lower right panel* is a comparison of phosphorylated MLC content in cells adhered to different substrates following 4 hr incubation. Note that by 4 hr, MLC phosphorylation is similar in cells adhered to Gal8 and to fibronectin. Lys, poly-L-lysine; FN, human fibronectin.

Figure 1

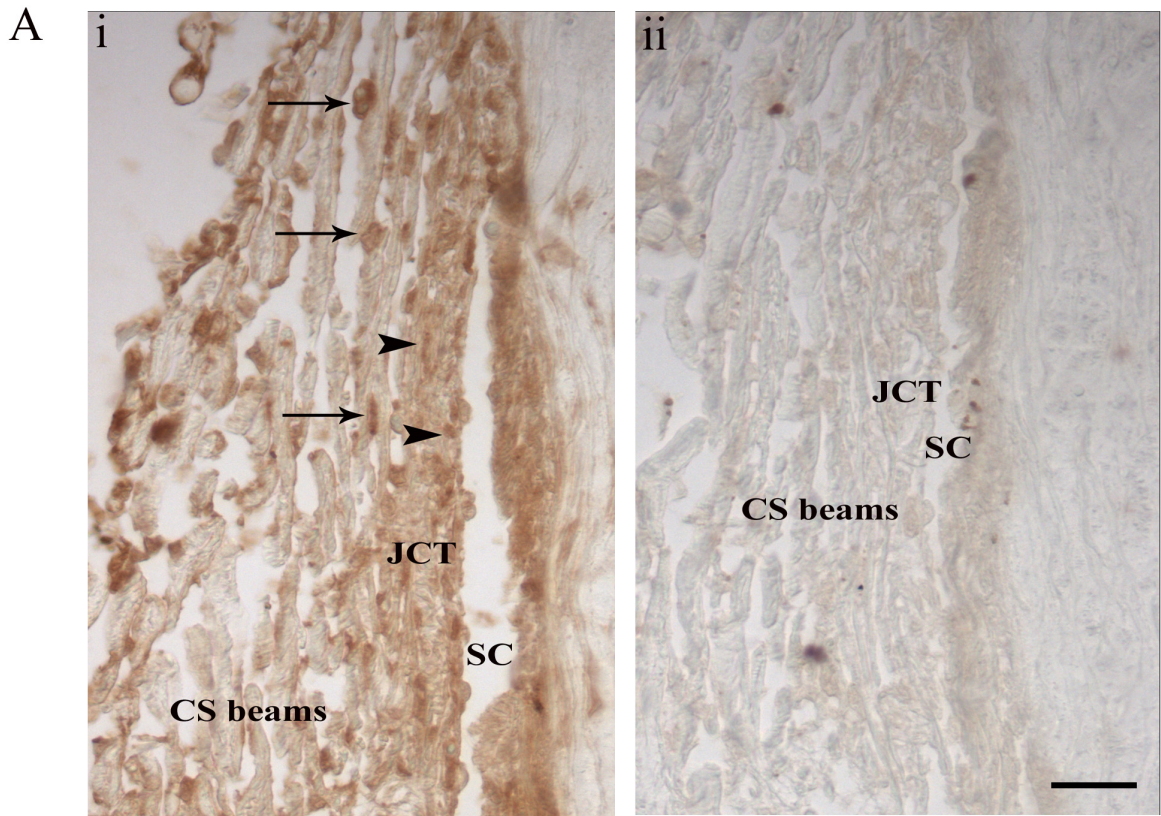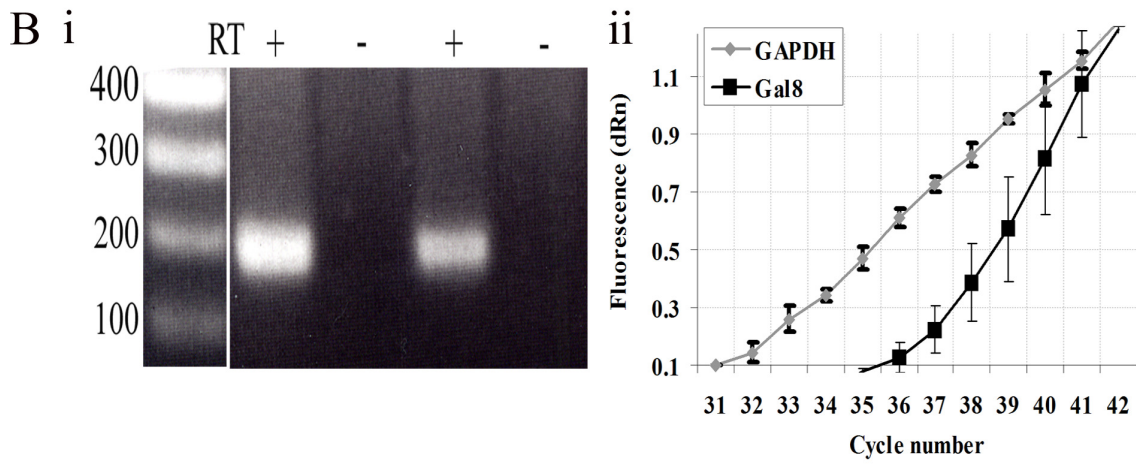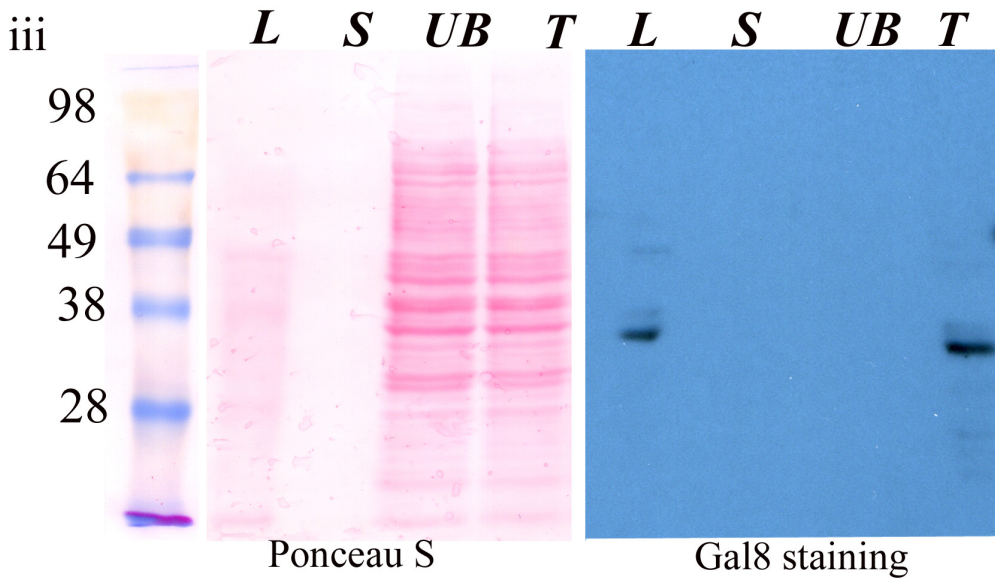

**Figure 2****A**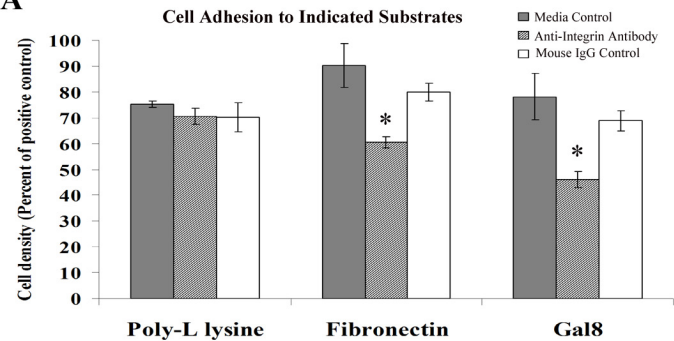**Bi**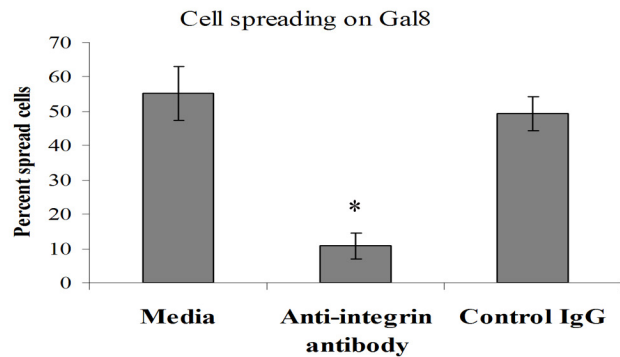**Bii**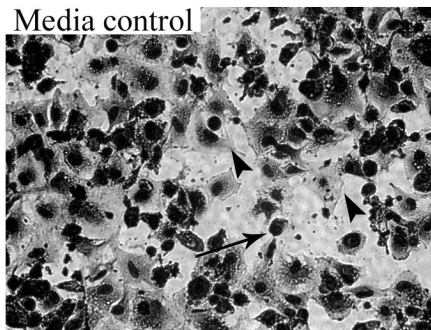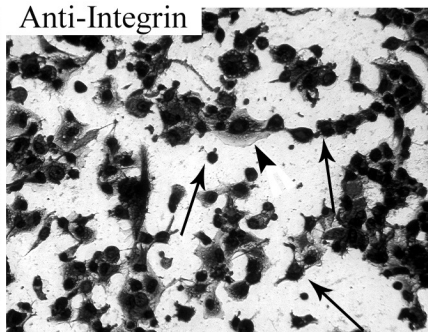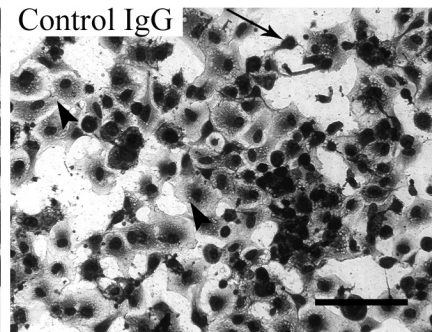



**Figure 3**

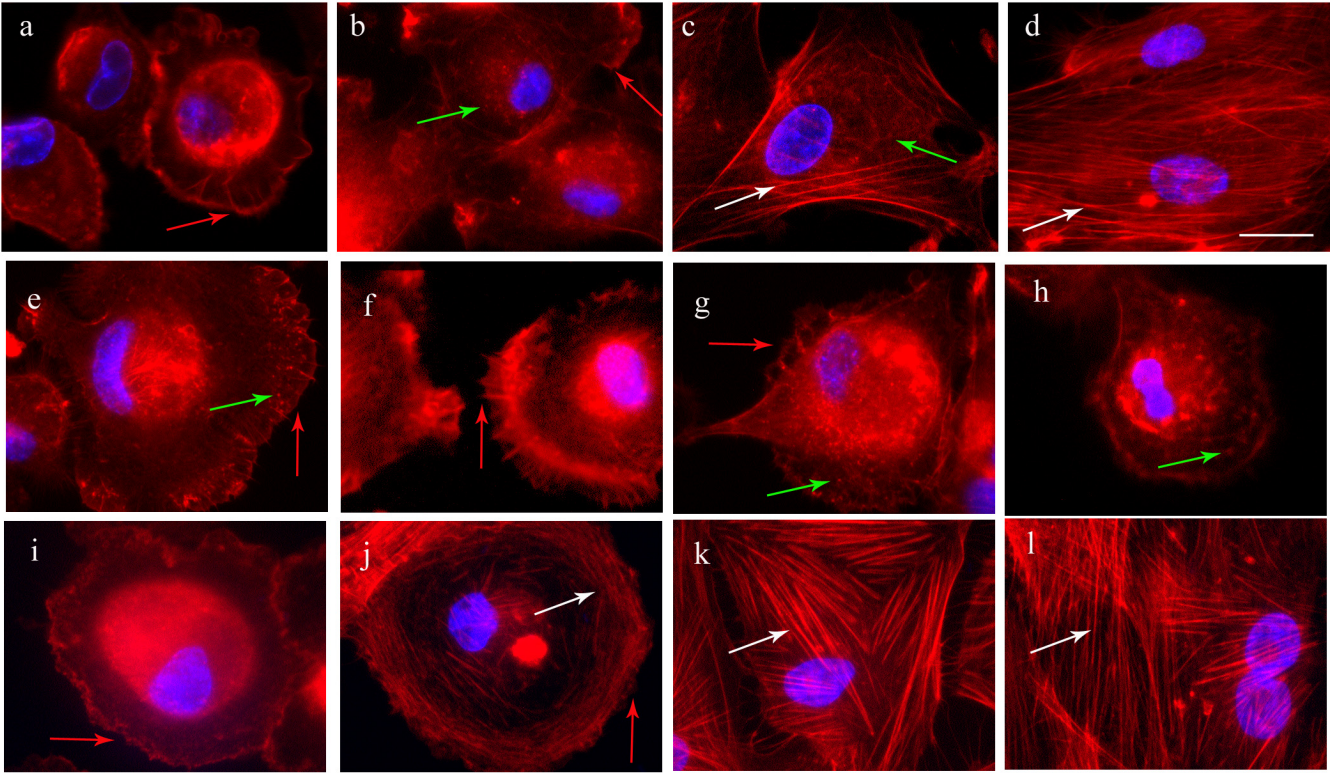

Figure 4

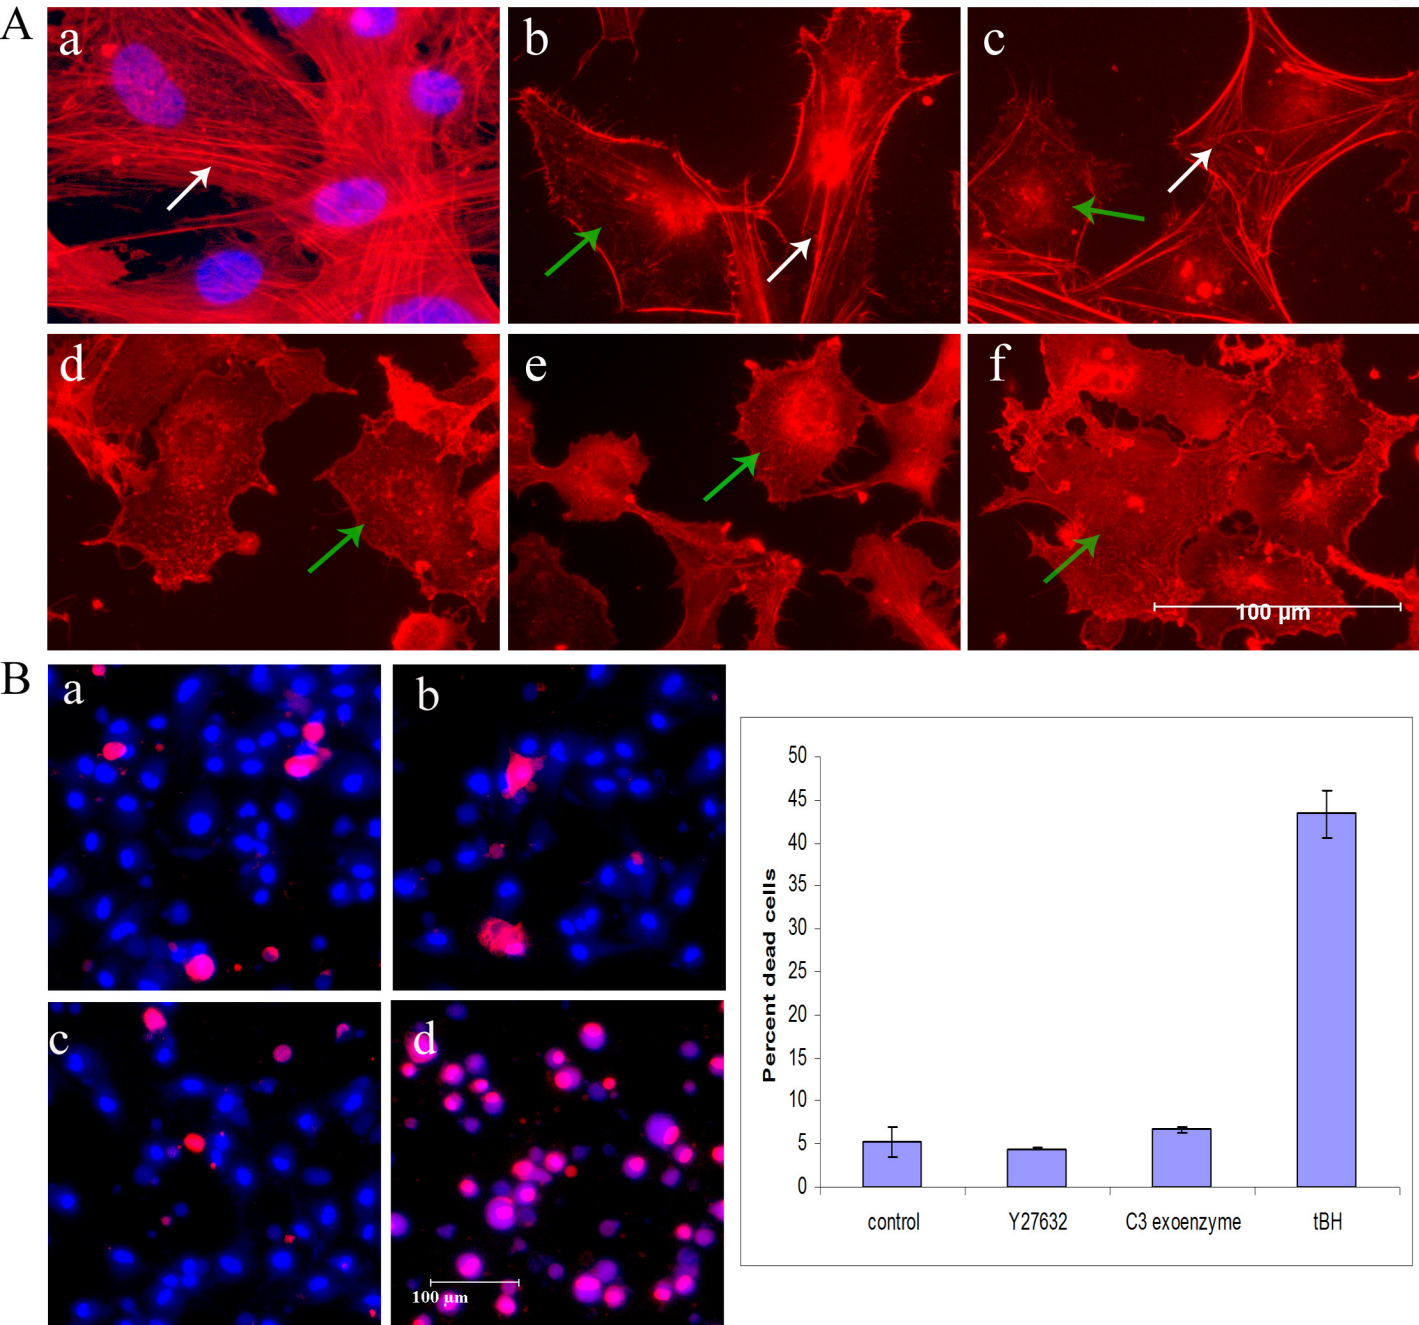

# Figure 5

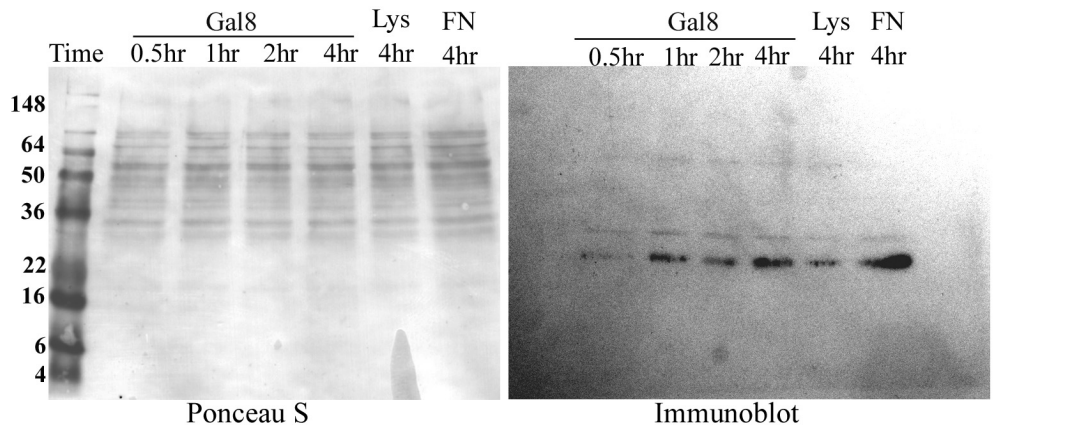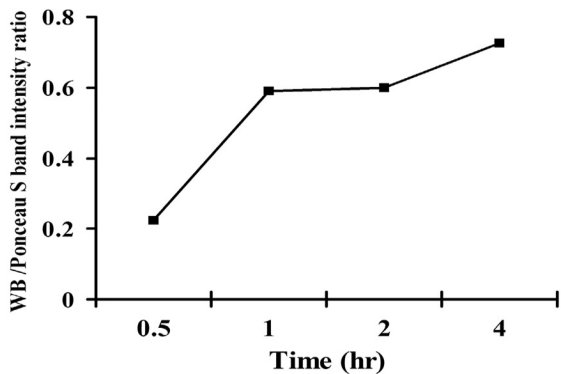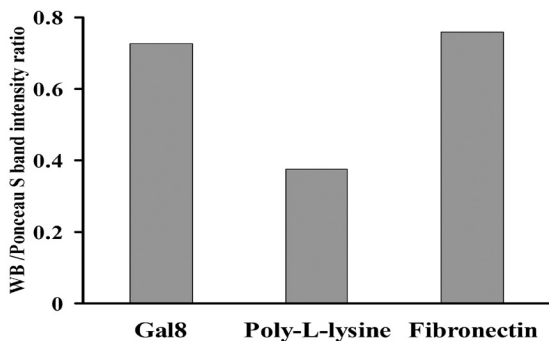

Supplement: cwn100_1.pdf [file cwn100_1.pdf]
